# Supplementary material
Source: PubMed Central journal article supplement (PMC9256806)
Supplement: NIHMS1808995-supplement-1808995_Supp_Fig.pdf [file NIHMS1808995-supplement-1808995_Supp_Fig.pdf]

Supplementary Materials (*Curtiss et al.*)

## Supplementary Methods

### *Cell Lines*

Kasumi-1 (ATCC), CMK (DSMZ) and MOLM-13 (DSMZ) cells were cultured in RPMI (Gibco) supplemented with 20% fetal bovine serum (FBS, HyClone), 2 mM GlutaMAX (Gibco), 100 units/mL Penicillin, and 100 ug/mL Streptomycin (Gibco). K562 (ATCC) cells were cultured in RPMI supplemented with 10% FBS. SNKO-1 cells were obtained from DSMZ and cultured in RPMI with 10% FBS and 10 ng/ml GM-CSF (PeproTech). All cells were cultured at 5% CO<sub>2</sub> and 37°C. Cell lines were tested monthly for mycoplasma contamination.

### *Patient Samples*

All patients gave informed consent to participate in this study, which had the approval and guidance of the institutional review boards at Oregon Health & Science University (OHSU), University of Utah, University of Texas Medical Center (UT Southwestern), Stanford University, University of Miami, University of Colorado, University of Florida, National Institutes of Health (NIH), Fox Chase Cancer Center and University of Kansas (KUMC). Samples were sent to the coordinating center (OHSU; IRB#9570; #4422; [NCT01728402](#)) where they were coded and processed. Mononuclear cells were isolated by Ficoll gradient centrifugation from freshly obtained bone marrow aspirates or peripheral blood draws. Clinical, prognostic, genetic, cytogenetic, and pathologic lab values as well as treatment and outcome data were manually curated from patient electronic medical records. Genetic characterization of the leukemia samples included results of a clinical deep-sequencing panel of genes commonly mutated in hematologic malignancies (Sequenome and GeneTrails (OHSU); Foundation Medicine (UTSW); Genoptix; and Illumina). Patient sample mononuclear cells were cultured in RPMI with 10% FBS and 50% HS-5 conditioned media (ATCC) or SFEMII supplemented with 1x StemSpan CD34+ Expansion Media and 1 uM UM729 (StemCell Technologies).

### *Mice*

Wild-type C57BL/6J mice (JAX# 000664), were obtained from the Jackson Laboratories. All animals were maintained on a normal 12:12 h light:dark cycle and provided ad

libitum access to water and food (Purina rodent diet 5001; Purina Mills). Female mice, eight weeks of age, were used for experimentation. No statistical methods were used to estimate sample size. All experiments were conducted in accordance with the NIH *Guide for the Care and Use of Laboratory Animals*(45) and approved by the Institutional Animal Care and Use Committee of Oregon Health & Science University.

### *Histology*

Prior to staining, Kasumi-1 cells were treated with avapritinib (12 nM; Selleck) and/or ORY-1001 (12 nM; Selleck) for 72 h. Cells were prepared for CytoSpin 3 Shandon as described by manufacturer's protocol (ThermoShandon). Slides were fixed and stained using May-Grunwald Giemsa. Samples were imaged using Zeiss ApoTome housed in the Advanced Light Microscopy Core (ALMC) at OHSU.

### *Colony Assay*

Whole bone marrow was obtained (AllCells) and CD34+ cells were selected using CD34 MicroBead Kit (Miltenyi Biotec) according to manufacturer's instructions. For the colony assay, 500 CD34+ cells were used per replicate and plated in MethoCult<sup>TM</sup> H4435 Enriched (StemCell Technologies). The four groups were treated with avapritinib (12 nM), ORY-1001 (12 nM), avapritinib and ORY-1001 (12 nM/drug), or DMSO. Plates were incubated for 14 days in 5% CO<sub>2</sub> and 37°C. Samples were imaged using STEMvision (StemCell Technologies) and blinded prior to counting by another investigator by assigning letters randomly. ImageJ (NIH) was used to count colonies after blinding.

### *Drug Synergy*

Drug synergy was assessed using an 8 x 8 matrix of drug concentrations. Avapritinib, ORY-1001, GSK-LSD1, and Wortmannin (Selleck) were used for these studies. Cells were treated for 72 h prior to MTS assay to evaluate viability. Cell viability was used to calculate drug synergy with SynergyFinder based on the ZIP reference model(44).

### *Flow Cytometry*

To assess apoptosis, Kasumi-1 cells were treated with 12 nM ORY-1001, 36 nM avapritinib, 12 nM ORY-1001/36 nM avapritinib or DMSO for 48 h. APC Annexin V apoptosis detection kit (Invitrogen) was used according to the manufacture's protocol. To assess myeloid differentiation, Kasumi-1 cells were treated with 12 nM ORY-1001, 12 nM avapritinib, 12 nM ORY-1001/12 nM avapritinib or DMSO for 24, 48, and 72 h. PerCP-

e710 CD86 (Invitrogen), PE-Cy7 CD11b (eBioScience), and APC CD84 (Biolegend) was used per the manufacturer's protocol. For cell cycle analysis, Kasumi-1 cells were treated with 12 nM ORY-1001, 36 nM avapritinib, 12 nM ORY-1001/12 nM avapritinib or DMSO for 24, 48, and 72 h. Cells were fixed using ethyl alcohol and stained with propidium iodide (BioLegend). Strained cells were analyzed on a LSRFortessa flow cytometer (BD) housed in the OHSU Flow Cytometry Shared Resource.

#### *Bulk RNA-sequencing*

Kasumi-1 cells were treated with 12 nM GSK-LSD1, 12 nM avapritinib, 12 nM GSK-LSD1/12 nM avapritinib or DMSO for 12 h. Total RNA was isolated using a RNeasy Plus Mini Kit (Qiagen). BGI performed the library preparation and sequencing at 50 base pair (BP) paired end (PE). For the Kasumi-1 PU.1 KD experiment, cells were treated with 1 ug/ml doxycycline, 50 nM avapritinib, 1 ug/ml doxycycline/50 nM avapritinib, or DMSO for 24 h. Total RNA was isolated with RNeasy Plus Mini Kit (Qiagen) and libraries were prepared with Zymo-Seq RiboFree Total RNA Library Kit (Zymo). The OHSU Massively Parallel Sequencing Shared Resource (MPSSR) performed the sequencing at 100 BP single end.

#### *Western Blots*

Kasumi-1 cells were treated with 12 nM ORY-1001, 12 nM avapritinib, 12 nM ORY-1001/12 nM avapritinib or DMSO for 24 h. Cells were lysed in cell lysis buffer (Cell Signaling Technologies) containing complete mini protease inhibitor tablets (Roche) plus phosphatase inhibitor cocktail 2 (Sigma Aldrich) and PMSF (Sigma Aldrich) for phospho-AKT western blots. Samples were spun at 14,000 x g for 10 minutes at 4°C. Lysates were mixed with 3x SDS sample buffer (75 mmol/L Tris (pH 6.8), 3% SDS, 15% glycerol, 8% β-mercaptoethanol, and 0.1% bromophenol blue) then incubated for 5 minutes at 95°C. Samples were run on Criterion 4–15% Tris-HCl gradient gels (Bio-Rad). Gels were transferred to PVDF membranes, then blocked in Tris-buffered saline with 0.05% Tween (TBST) and 5% milk or EveryBlot Blocking Buffer (Bio-Rad). Blots were probed with MYC (#13987, CST), PU.1 (MA5-15064, Invitrogen), LSD1 (#2139, CST), KIT (#3074, CST), AKT (#9272, CST), pAKT S473 (#4060, CST), EZH2 (#5246, CST), STAT5 (#94205, CST), or β-actin (#8457, CST) antibodies at 1:1000 in TBST overnight at 4°C. Membranes were incubated for 1 hour at room temperature with HRP-

conjugated secondary antibody (#7074S, CST) at 1:5000. SuperSignal™ West Pico PLUS Chemiluminescent Substrate (ThermoFisher) was used to develop blots. Imaging was done on BioRad ChemiDoc Imaging System and analyzed using Image Lab (BioRad).

#### *Cloning*

Wild type *MYC* (pDONR223\_MYC\_WT was a gift from Jesse Boehm & Matthew Meyerson & David Root; Addgene plasmid # 82927 ; <http://n2t.net/addgene:82927> ; RRID:Addgene\_82927) was cloned into a Gateway-converted pMSCV-IRES-GFP vector (a gift from Tannishtha Reya; Addgene plasmid #20672; <http://n2t.net/addgene:20672>; RRID:Addgene\_20672). Plasmid sequences were confirmed via Sanger sequencing (Eurofins Genomics).

#### *Retrovirus generation and transduction*

HEK 293T17 cells (ATCC) were grown in DMEM (Gibco) medium with 10% FBS (HyClone), Glutamax (Gibco), and penicillin/streptomycin (Gibco). Retrovirus was generated by transfecting MYC pMSCV-IRES-GFP (pMIG) or control vector plasmids and the EcoPac plasmid (provided by Dr. Rick Van Etten) into the 293T17 cells using FuGENE 6 (Promega). Viral supernatants were harvested 48 and 72 h later. Kasumi-1 cells ( $1 \times 10^6$  cells/well) were spinoculated with viral supernatant, HEPES buffer, and polybrene on two subsequent days by centrifuging at 2500 rpm for 90 minutes at 30°C with no break. Transduced cells were isolated using a Symphony S6 (BD Biosciences).

#### *CUT&Tag*

Kasumi-1 cells were treated with 12 nM GSK-LSD1, 12 nM avapritinib, 12 nM GSK-LSD1/12 nM avapritinib or DMSO for 24 hr. Benchtop CUT&Tag was performed as previously described(46). Cells were counted, harvested, and centrifuged for 5 min at 300xg at room temperature. Cells were washed 2X in 1.5 mL wash buffer (20 mM HEPES pH 7.5, 150 mM NaCl, 0.5 mM Spermidine, 1× Protease inhibitor cocktail). Concanavalin A magnetic coated beads (Bangs Laboratories) were activated in binding buffer by washing 2X (20 mM HEPES pH 7.5, 10 mM KCl, 1 mM CaCl<sub>2</sub>, 1 mM MnCl<sub>2</sub>). Washed cells were separated into 100,000 cell aliquots and 10 ul of activated beads were added to each sample. Samples rotated end over end for 7 minutes at room temperature. A magnetic

## Combined KIT and LSD1 Inhibition in AML

stand was used to separate beads, supernatant was removed. Primary antibody was diluted 1:50 in antibody buffer (20 mM HEPES pH 7.5, 150mM NaCl, 0.5 mM Spermidine, 1× Protease inhibitor cocktail, 0.05% digitonin, 2 mM EDTA, 0.1% BSA). Cells were incubated overnight at 4°C on a nutator. Primary antibody was replaced with a guinea-pig anti rabbit secondary antibody diluted to 1:100 in wash buffer (Antibodies Online). Samples were incubated for 45 minutes at room temperature on nutator. Secondary antibody was removed and samples were washed 2X in dig-wash buffer (20 mM HEPES pH 7.5, 150 mM NaCl, 0.5 mM Spermidine, 1× Protease inhibitor cocktail, 0.05% Digitonin). pA-Tn5 transposase, prepared and loaded with adaptors, was diluted 1:100 in dig-300 buffer (20 mM HEPES pH 7.5, 300 mM NaCl, 0.5 mM Spermidine, 1× Protease inhibitor cocktail, 0.01% digitonin) and added to samples. Samples were incubated for 1 hour at room temperature on nutator. Samples were washed 2X with dig-300 buffer then resuspended in tagmentation buffer (dig-300 buffer with 1 mM MgCl<sub>2</sub>). Samples were incubated at 37°C for 1 hour. DNA was extracted with phenol:chloroform extraction. Samples were amplified by PCR using custom nextera primers at 400 nM and NEBNext HiFi 2x PCR Master Mix (New England Biolabs)(47). PCR conditions were set to: 72°C for 5 minutes, 98°C for 30 seconds, 14 cycles of 98°C for 10 sec, 63°C for 10 sec, and 72°C for 1 minute. Libraries were purified with AMPure Beads (Beckman) and sequenced on a NextSeq 500 sequencer (Illumina) using 37 BP PE sequencing by MPSSR.

Kasumi-1 PU.1 sh401 cells were treated with 1 ug/ml doxycycline, 50 nM avapritinib, 1 ug/ml doxycycline/50 nM avapritinib, or DMSO for 24 h. 14-00613 cells were treated with 12 nM ORY-1001, 350 nM avapritinib, 12 nM ORY-1001/350 nM avapritinib, or DMSO for 24 h. CUT&Tag was adapted from the benchtop version and was performed similarly to the updated protocol(48). Nuclei were prepared by incubating cell on ice for 10 minutes with NE1 buffer (20 mM HEPES-KOH pH 7.9, 10 mM KCl, 0.5 mM spermidine, 0.1% Triton X-100, 10% glycerol, 1x Protease inhibitor cocktail). Cells were centrifuged at 1300xg for 4 minutes at 4°C and supernatant was removed. Nuclei extract was resuspended in wash buffer (20 mM HEPES pH 7.5, 150 mM NaCl, 0.5 mM Spermidine, 1× Protease inhibitor cocktail) and 10% DMSO and frozen at -80°C. Briefly, 100,000 nuclei were thawed and incubated with 5 ul activated Concanavalin A beads (Bangs Laboratory)

## Combined KIT and LSD1 Inhibition in AML

for 10 minutes at room temperature. Supernatant was removed and beads were resuspended in wash buffer. Samples were incubated with primary antibody diluted 1:100 in antibody buffer (wash buffer with 2 mM EDTA, 0.1% BSA) overnight at 4°C on the nutator. Primary antibody was removed, and beads incubated with guinea-pig anti rabbit secondary antibody diluted to 1:100 in wash buffer (Antibodies Online) for 30 minutes on nutator at room temperature. Beads were washed 2x with wash buffer. Beads incubated with pA-Tn5 (EpiCypher) diluted 1:20 in 300-wash buffer (20 mM HEPES pH 7.5, 300 mM NaCl, 0.5 mM Spermidine, 1× Protease inhibitor cocktail) for 1 h at room temperature on the nutator. Beads were washed 2x in 300-wash buffer and resuspended in tagmentation solution (300-wash buffer with 10 mM MgCl<sub>2</sub>). Samples incubated at 37°C for 1 hour in a PCR cycler with heated lid then were washed 1x in TAPS wash buffer (10 mM TAPS, 0.2 mM EDTA). Beads were resuspended in 0.1% SDS release solution (0.1% SDS, 10 mM TAPS) and incubated for 1 hour at 58°C in a PCR cycler with heated lid. Triton neutralization solution (0.67% triton-X100) was added to bead slurry. Samples were amplified by PCR using custom nextera primers at 400 nM and NEBNext HiFi 2x PCR Master Mix (New England Biolabs)(47). PCR conditions were set to: 58°C for 5 minutes, 72°C for 5 minutes, 98°C for 30 seconds, 12 cycles of 98°C for 10 sec, 60°C for 10 sec, and 72°C for 1 minute. Libraries were purified with HighPrep PCR Clean-up System (MagBio) and sequenced on a NextSeq 500 sequencer (Illumina) using 37 BP PE sequencing by MPSSR.

### *CUT&RUN*

Kasumi-1 cells were treated with 12 nM GSK-LSD1, 12 nM avapritinib, 12 nM GSK-LSD1/12 nM avapritinib or DMSO for 12h or 24 h. CUT&RUN was performed as previously described(49). Briefly, concanavalin A magnetic coated beads (Bangs Laboratories) were washed 2x in binding buffer (20 mM HEPES pH 7.5, 10 mM KCl, 1 mM CaCl<sub>2</sub>, 1 mM MnCl<sub>2</sub>) to activate. 500,000 cells per replicate were washed 2x with wash buffer (20 mM HEPES pH 7.5, 150 mM NaCl, 0.5 mM Spermidine, 1× Protease inhibitor cocktail). Cells were bound to beads by nutating for 10 minutes at room temperature. Cells were permeabilized and incubated over night at 4°C on nutator with primary antibody in antibody buffer (wash buffer, 0.001% digitonin, 3 mM EDTA). Bead slurry was washed 2x with dig wash buffer (wash buffer, 0.001% dig) and resuspended with dig wash buffer and

1x pAG-MNase (Epicypther). Cells were incubated for 10 minutes on nutator at room temperature then washed 2x with dig wash buffer followed by resuspension in pAG-MNase reaction mix (dig wash buffer, 2 mM CaCl<sub>2</sub>). Bead slurry was incubated for 2 h at 4°C on nutator. STOP buffer (340 mM NaCl, 20 mM EDTA, 4 mM EGTA, 50 µg/mL RNase A, 50 µg/mL glycogen, 0.02% dig) was then added, then tubes were incubated at 37°C for 10 minutes. DNA was extracted using phenol:chloroform extraction. Libraries were prepared using NEBNext Ultra II DNA Library Prep Kit (NEB), modified for CUT&RUN as previously described(50). After adapter ligation fragments were cleaned up with 1.75x AMPure beads (Beckman). Following PCR amplification, libraries were purified 2x with 1.2x AMPure beads to rid of adaptor fragments. Libraries were quantified on the 2100 Bioanalyzer instrument (Agilent) with the High Sensitivity DNA Analysis Kit (Agilent). Libraries were pooled and sequenced by MPSSR on a NextSeq 500 sequencer (Illumina) using 37 BP PE sequencing.

### *RNA Interference*

Two SMARTvector Inducible Human SPI1 hEF1a-TurboRFP shRNAs for SPI1/PU.1 were obtained from Horizon Discovery (230493625, 230705089). Lentivirus was produced by transfecting Lenti-X 293T cells (Clontech) with the SMARTvector transfer plasmid and packaging/pseudotyping plasmids. psPAX2 was a gift from Didier Trono (Addgene plasmid #12260; <http://n2t.net/addgene:12260> ; RRID:Addgene\_12260) and pMD2.G was a gift from Didier Trono (Addgene plasmid #12259 ; <http://n2t.net/addgene:12259> ; RRID:Addgene\_12259). The supernatants containing lentivirus was collected after 48 h of culture and filtered with a 0.45 µm filter. Kasumi-1 cells were transduced with virus via spinoculation in the presence of polybrene. Transduced cells were selected with 1 µg/ml puromycin to produce a stable cell line.

### *Fluorescent Biosensor Assay*

Kasumi-1 cells were transduced with ERK-TB-pHAGE-Clover-H2BmiRFP670nano and AKT-TB-pHAGE-mScarlet-H2BmiRFP670nano derived from ERK-KTR (PMID: 24949979) and AKT-KTR (PMID: 27247077) respectively. Transduced cells were sorted on a BD FACSAria Fusion housed at the OHSU Flow Cytometry Shared Resource to enrich the triple positive cells (Clover+, mScarlet+, & miRFP670nano+). For time lapse imaging, biosensor-expressed cells were resuspended in FluoroBrite DMEM (Gibco), 1x

GlutaMAX (Gibco), and 20% FBS, and then seeded on a 96 well plate at density of ~10,000 cells/well. Cells were imaged on the Yokogawa CSU-X1 spinning disk confocal microscope housed in ALMC under cell culture-optimized temperature, humidity and CO<sub>2</sub> levels. Cell images were captured every 15min for a total of 25 h after drug loading.

#### *Reverse Phase Protein Array*

Kasumi-1 cells were treated for 1 h and 24 h with 100nM avapritinib and 12 nM ORY-1001. Cells were washed 2x in PBS then flash frozen. Cell pellets were lysed and processed by the University of Texas MD Anderson Cancer Center Functional Proteomics RPPA Core Facility. Linear normalized values used for CausalPath and log normalized values used for heatmap generation.

#### *ATAC sequencing*

Patient sample 15-00807 was treated with 50 nM avapritinib, 50 nM ORY-1001, 50 nM avapritinib/50 nM ORY-1001, or DMSO for 24 h. Samples were prepared as previously described(51). In brief, cells were resuspended in cold PBS and tagmentation master mix (25 ul of 2× tagmentation buffer, 2.5 ul of TDE1 [Illumina], 0.5 ul of 1% digitonin; 2x tagmentation buffer: 66 mM Tris-Acetate, pH 7.8, 132 mM potassium acetate, 20 mM magnesium acetate, 32% v/v N,N-Dimethylformamide) was added. Samples were incubated at 37°C for 30 minutes. DNA was purified using Zymo Clean and Concentrator 5 Kit (Zymo). Transposed DNA was amplified and purified as described previously with adapted primers(34,47). Samples were quantified using Qubit dsDNA HS Assay Kit (Invitrogen), pooled, and sequenced by Genewiz with a HiSeq-X (Illumina) using 75 BP PE sequencing.

#### *Single Cell RNA Sequencing*

Patient sample 14-00613 was treated with 12 nM ORY-1001, 12 nM avapritinib, 12 nM ORY-1001/12 nM avapritinib or DMSO for 24 h then harvested. Cells were loaded onto the Chromium Controller (10X Genomics) according to the manufacturer's instructions. RNA libraries were prepared per the manufacturer's protocol, Chromium Next GEM Single Cell 3' Reagent v3.0 Kit (Biolegend, 10X Genomics). Libraries were sequenced on a HiSeq2500 (Illumina) using 100 BP PE sequencing.

### **Data Analysis**

#### *AML LSD1 expression analysis*



Gene expression data in the form of RPKM was obtained through the BeatAML database(14,15). Patients with mutant KIT and healthy controls were included in the analysis.

#### *CUT&Tag and CUT&RUN Analysis*

CUT&Tag and CUT&RUN libraries were aligned to the human genome (hg38) using Bowtie2(52) and the following options --local --very-sensitive-local --no-unal --no-mixed --no-discordant --phred33 -I 10 -X 700. Peaks were called using GoPeaks(53). High confidence peaks were defined by presence in 2/2 or 2/3 replicates. Consensus bed files were formed by merging the high confidence peaks from DMSO, avapritinib, ORY-1001, and combination using BEDTools(54). Differential peaks were identified using DESeq2(55) with default parameters. Heatmaps were produced using the ComplexHeatmap package from Bioconductor(56). Peaks were annotated to the nearest feature using ChIPseeker(57). GO analysis was performed using Genomic Regions Enrichment of Annotations Tool (GREAT)(58). Counts tables for differential peaks were produced using multicov from BEDTools(54). Counts per million (CPM) normalized tracks, global signal heatmaps, and plot profiles at specified regions were generated using DeepTools(59). The DeepTools matrix was extracted and used to assess differences in H3K27Ac signal. Active promoters were defined by the presence of H3K4me3 and H3K27Ac within 1000 bp of a TSS. Active enhancers were defined by the presence of H3K4me1 and H3K27Ac beyond 1000 bp of a TSS. CPM normalized tracks were merged with bigWigMerge(60) and visualized using Integrative Genomics Viewer(61).

#### *ATAC Analysis*

ATAC libraries were aligned to the human genome (hg38) using BWA-MEM(62) and sorted using SAMtools(63). Duplicates were marked with Sambamba(64), duplicates and mitochondrial reads were removed. CPM normalized tracks were generated with DeepTools(59). Differential accessibility was assessed with DESeq2(55). GO analysis was performed using GREAT(58). CPM normalized tracks were merged with bigWigMerge(60) and visualized using Integrative Genomics Viewer(61).

#### *Bulk RNA Sequencing Analysis*

Raw reads were trimmed with Trimmomatic(65) and aligned with STAR(66). Differential expression analysis was performed using DESeq2(55). Raw p values were adjusted for

multiple comparisons using the Benjamini-Hochberg method. GO analysis was performed using Enrichr(67) and Gene Set Enrichment Analysis (GSEA)(68).

#### *Single Cell RNA Sequencing Analysis*

Sequencing output from 10X mRNA sequencing libraries were aligned to human genome (hg38) using CellRanger. Filtered feature matrices were analyzed using Seurat(69). Cells expressing greater than 20% mitochondrial RNA were excluded as non-viable. Data integration revealed seven transcriptional clusters. Cluster identity was established via expression of early (CD34, SOX4, ERG, MYB, and GATA2), mid (CEBPD), and late (LYZ, ITGAX, CD14) features of hematopoiesis.

#### *Fluorescent Biosensor Analysis*

Cells were tracked and subcellular fluorescence signals were measured using IMARIS software at ALMC. Heatmaps and lineplots of AKT and ERK activity were created using customized Python algorithm and Excel. Cells were separated into different AKT dynamics clusters by hierarchical clustering. Cell number was scaled to be equal across conditions and the abundance of differently treated cells per each cluster was calculated.

#### *Quantification and Statistical Analysis*

Data are shown as mean  $\pm$  SEM. Prism software (version 9.1; Prism Software Corp.) or RStudio was used to perform statistical analysis, which are described in the figure legends. All data were analyzed with Kolmogorov-Smirnov (KS) test, Mann-Whitney test, or ANOVA followed by Holm-Sidak correction. For differential analysis of RNA-seq, CUT&Tag, CUT&RUN, and ATAC-seq *p*-values were adjusted for repeated testing with a false discovery rate using the Benjamini-Hochberg method(70).

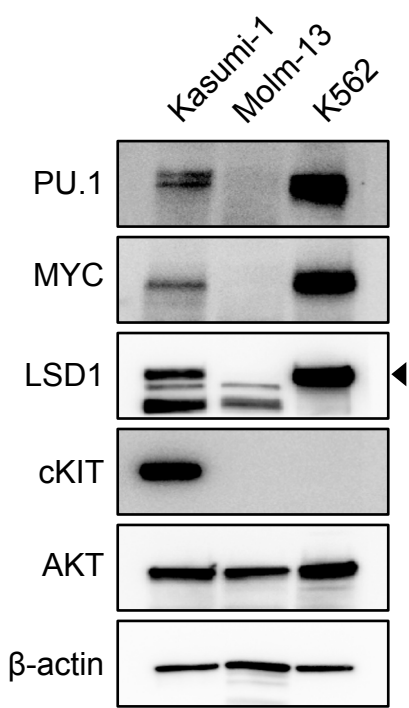

Figure S1

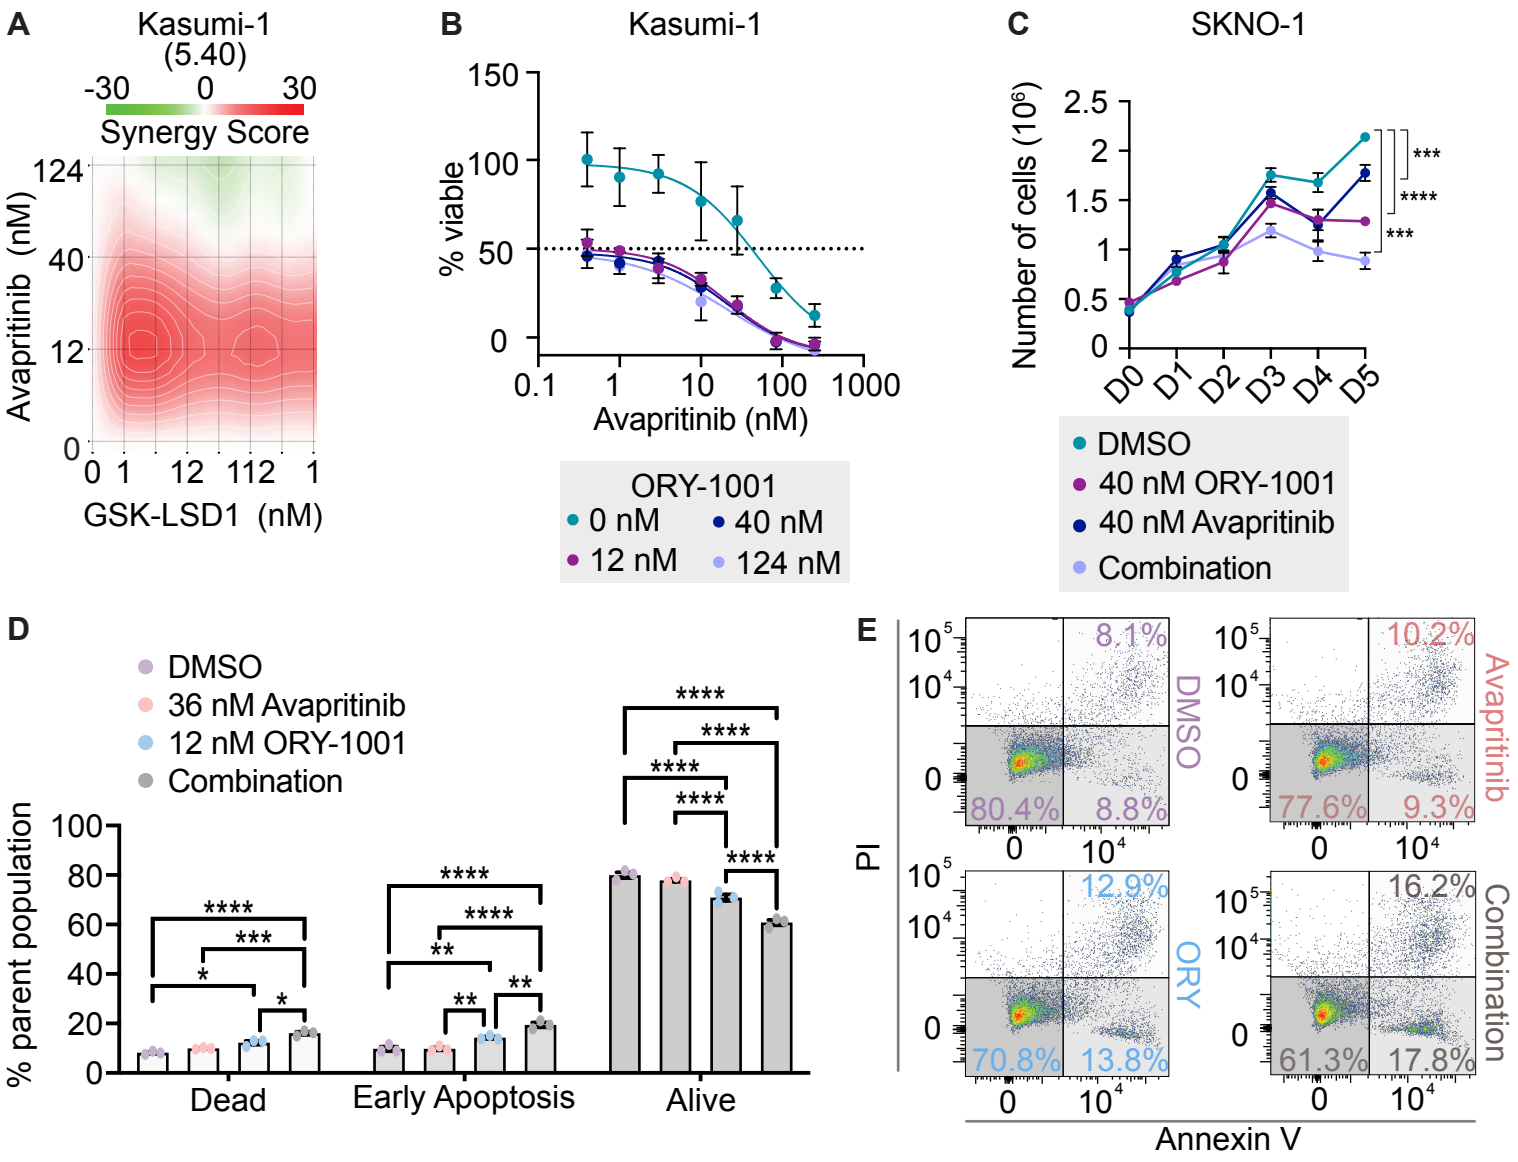

Figure S2

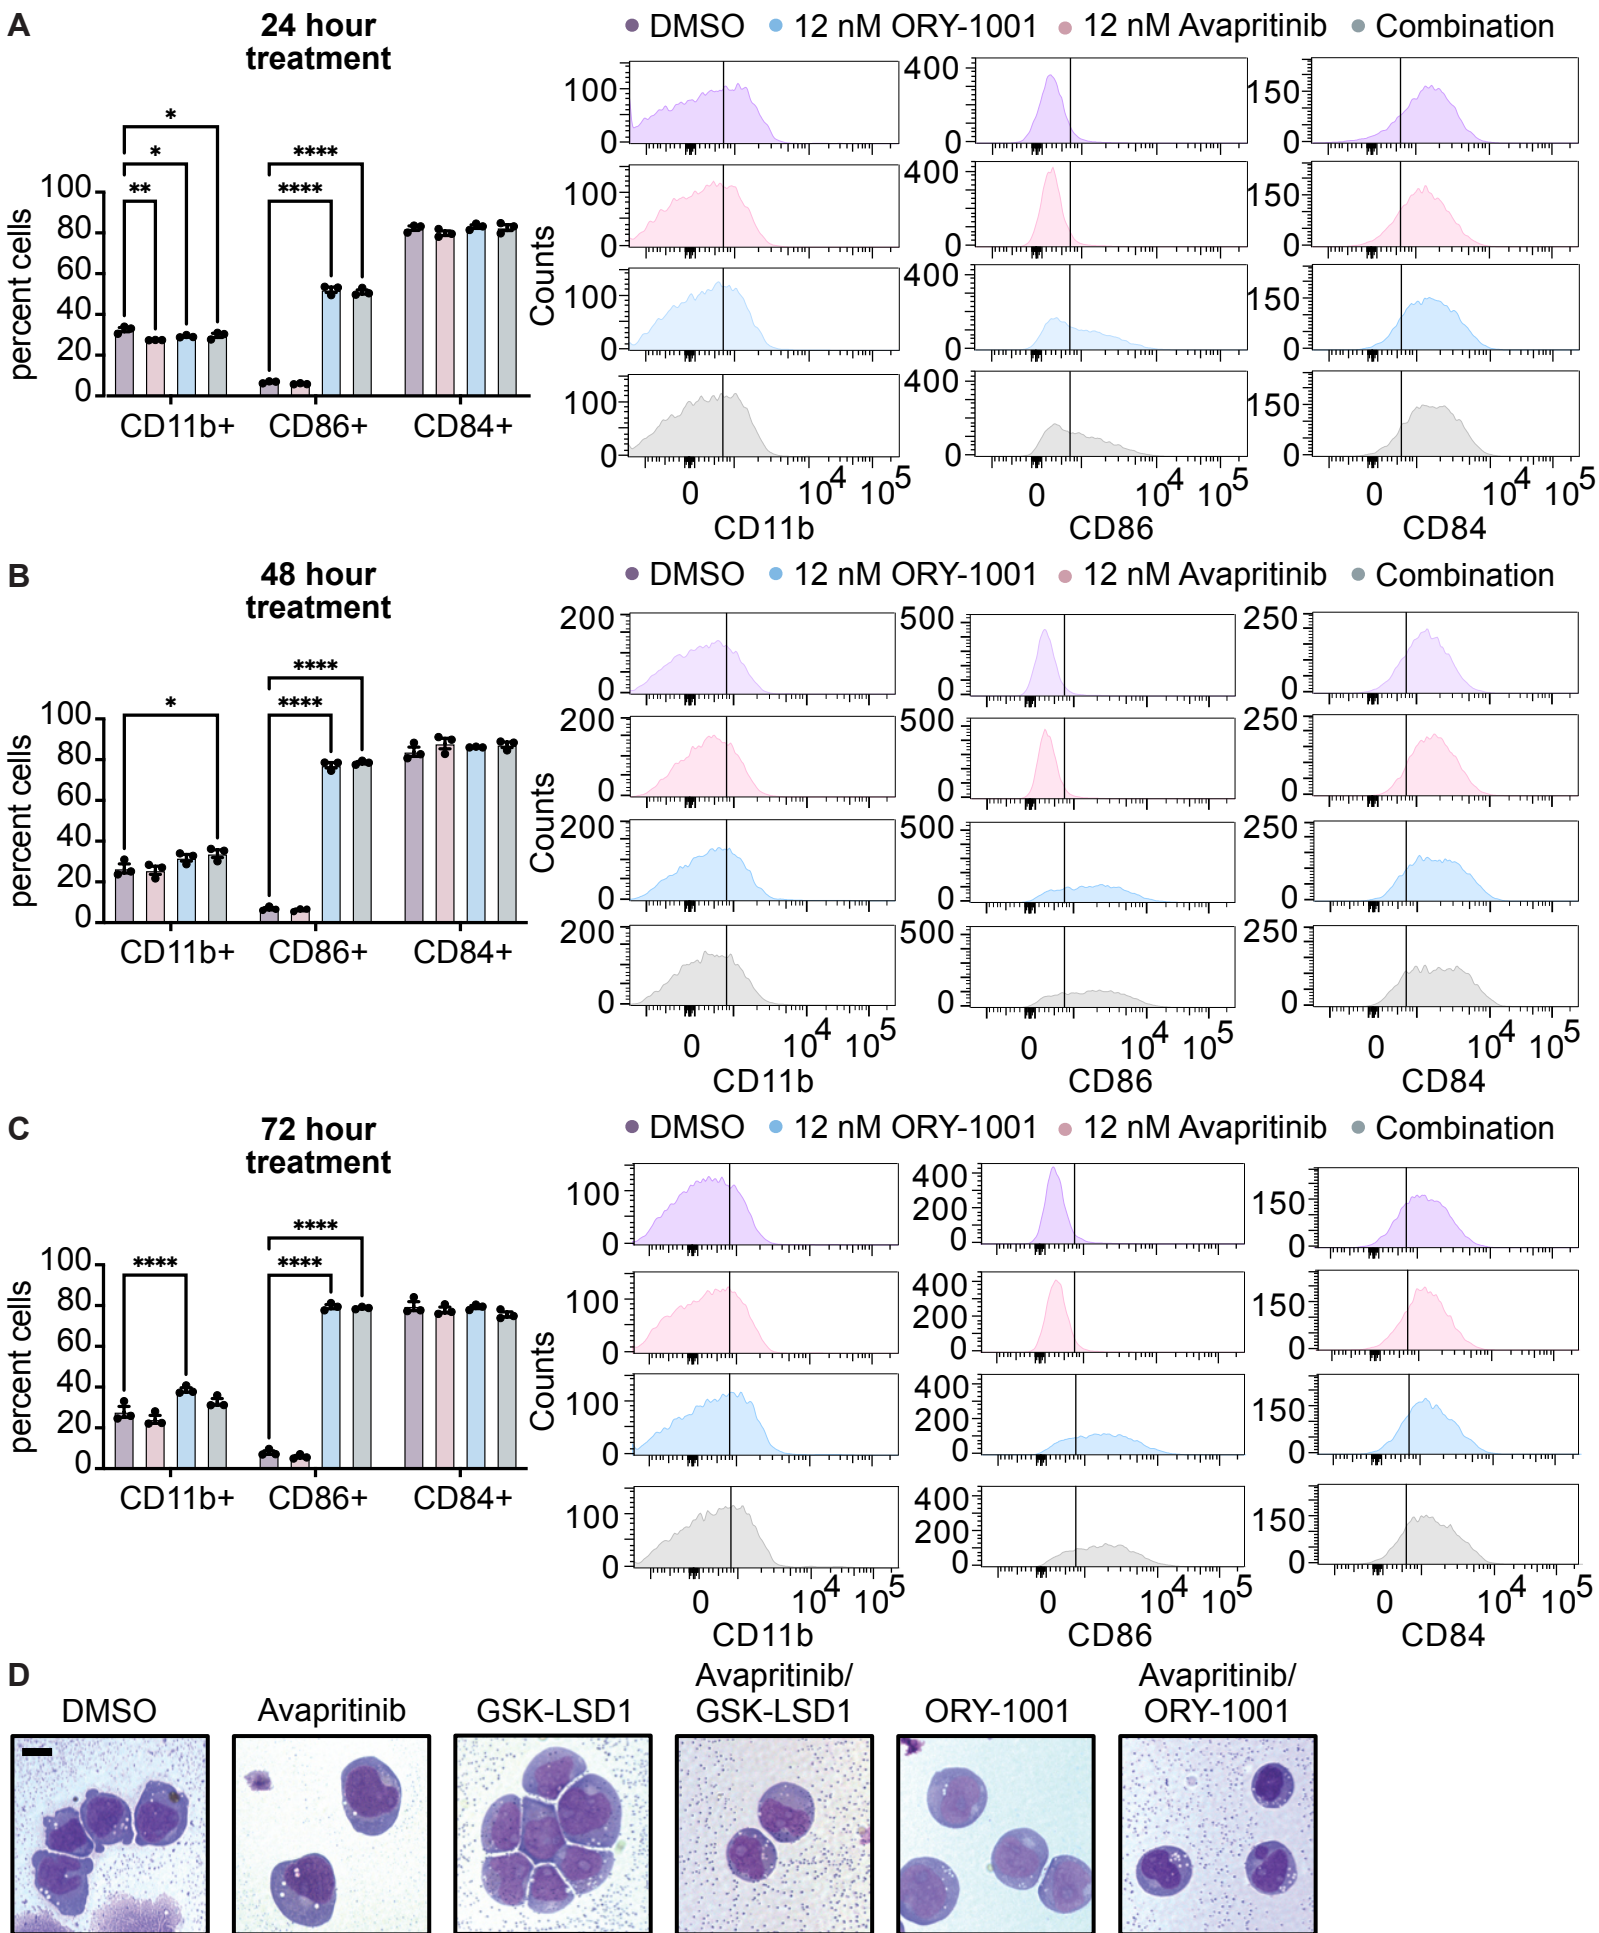

Figure S3

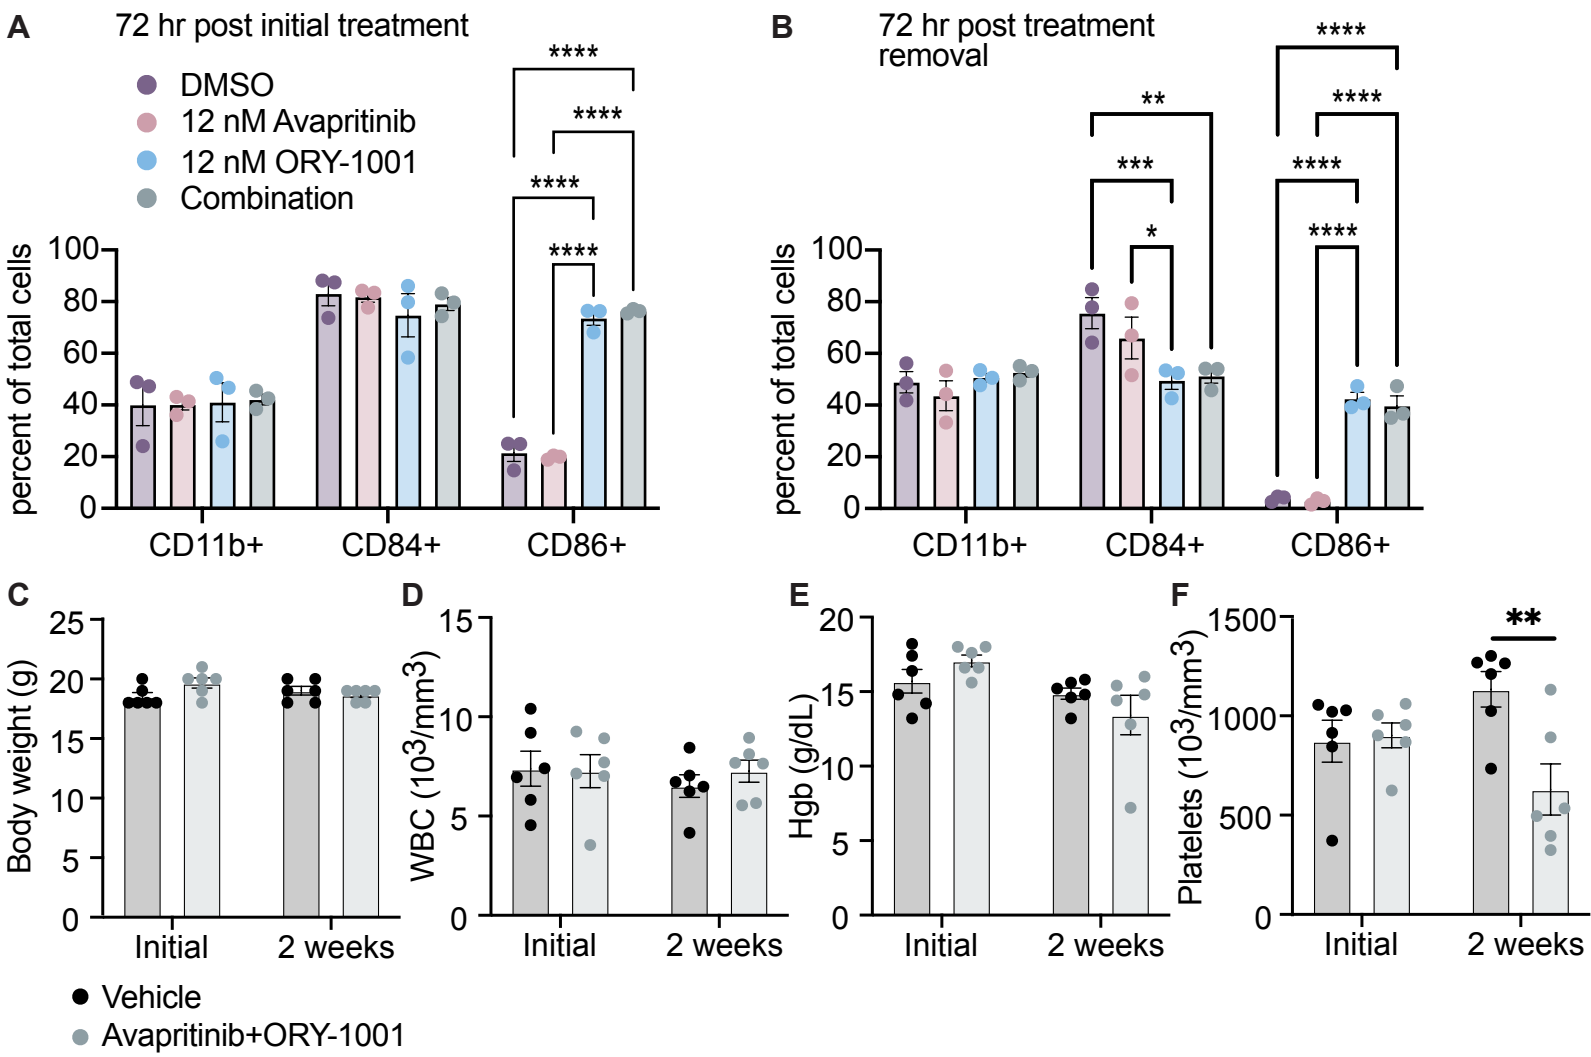

Figure S4

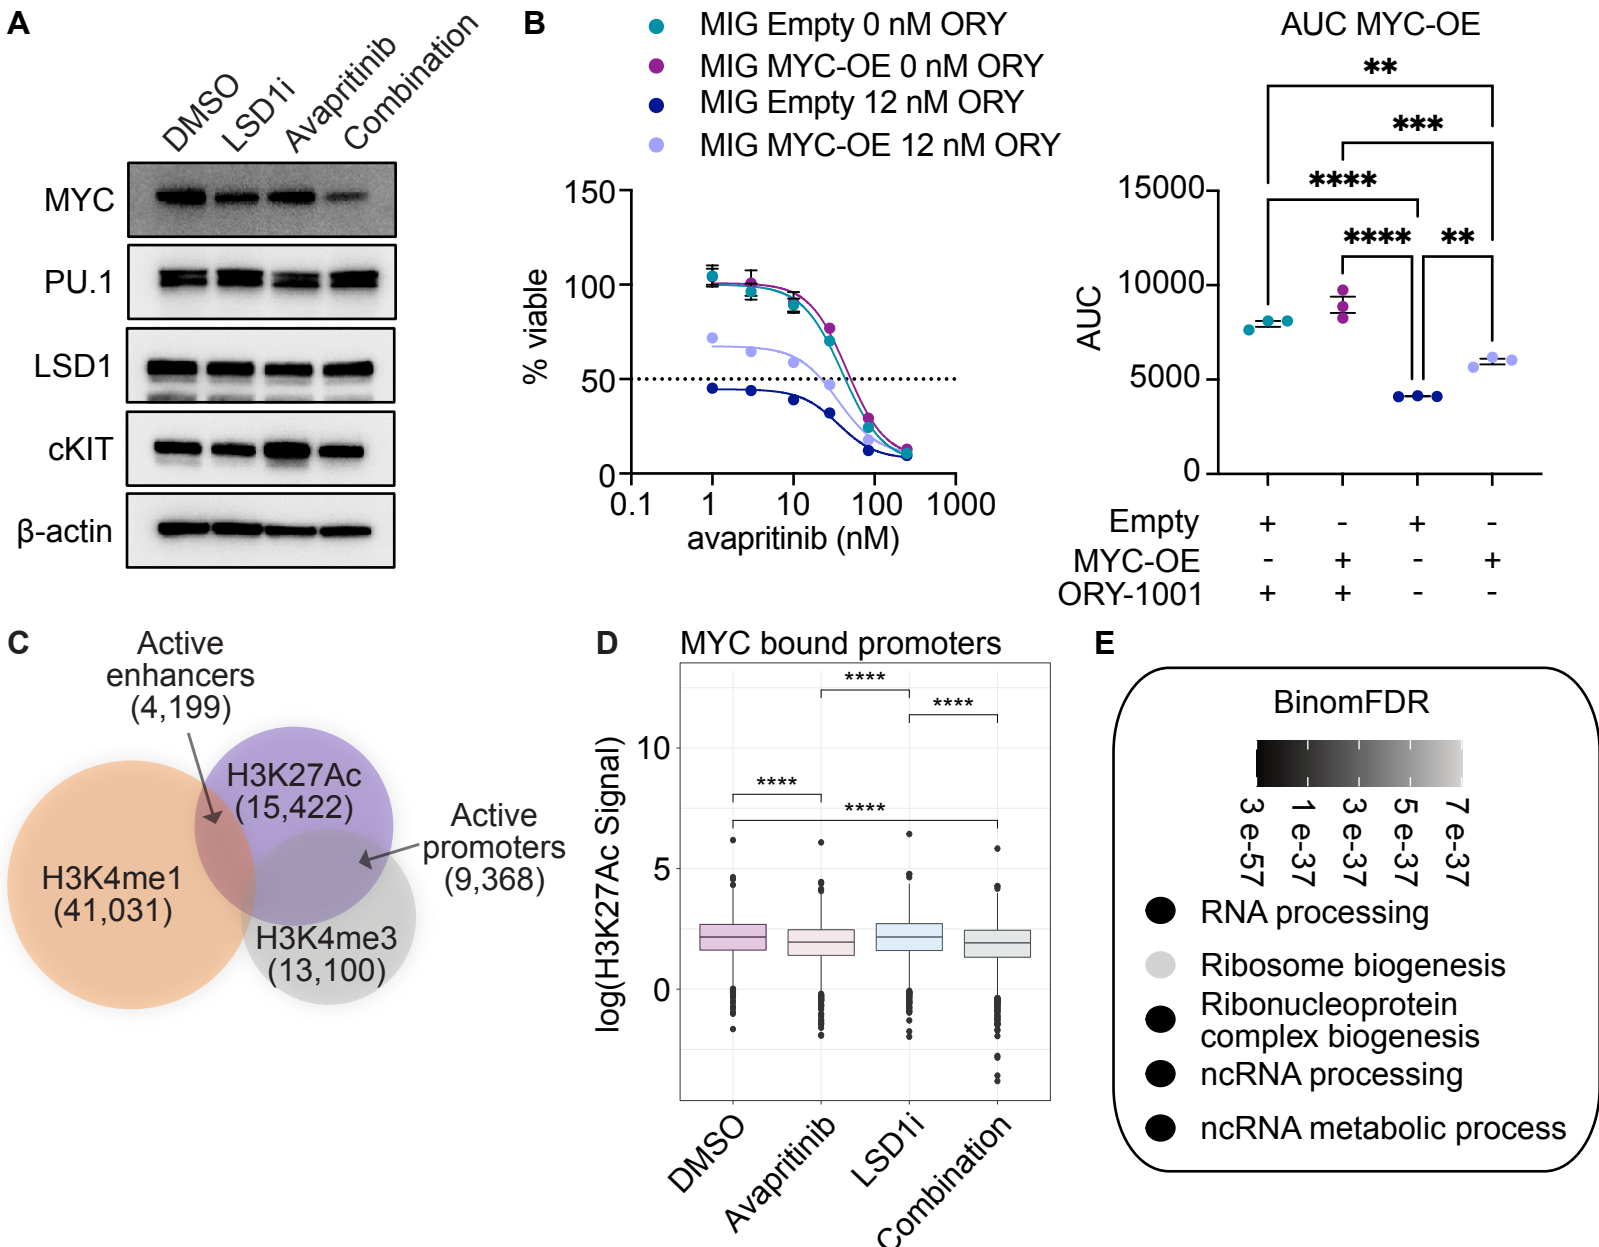

Figure S5

**A**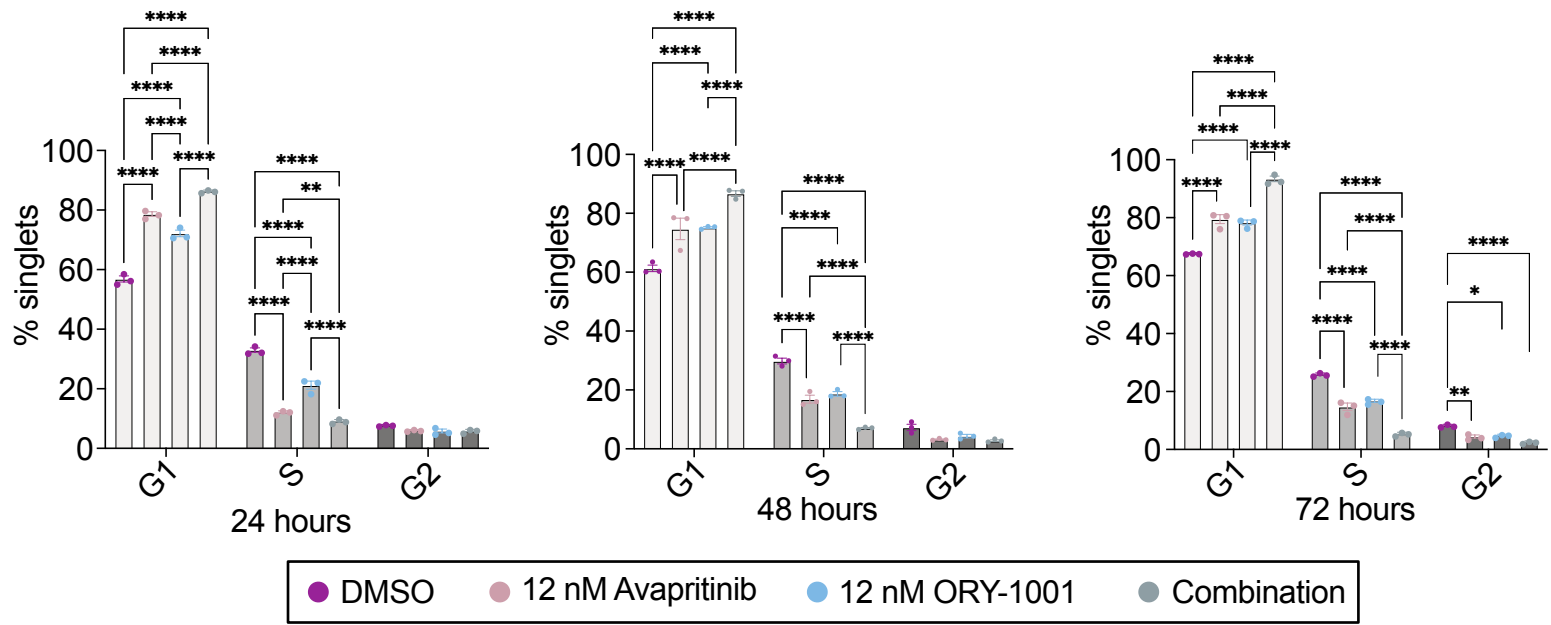**B**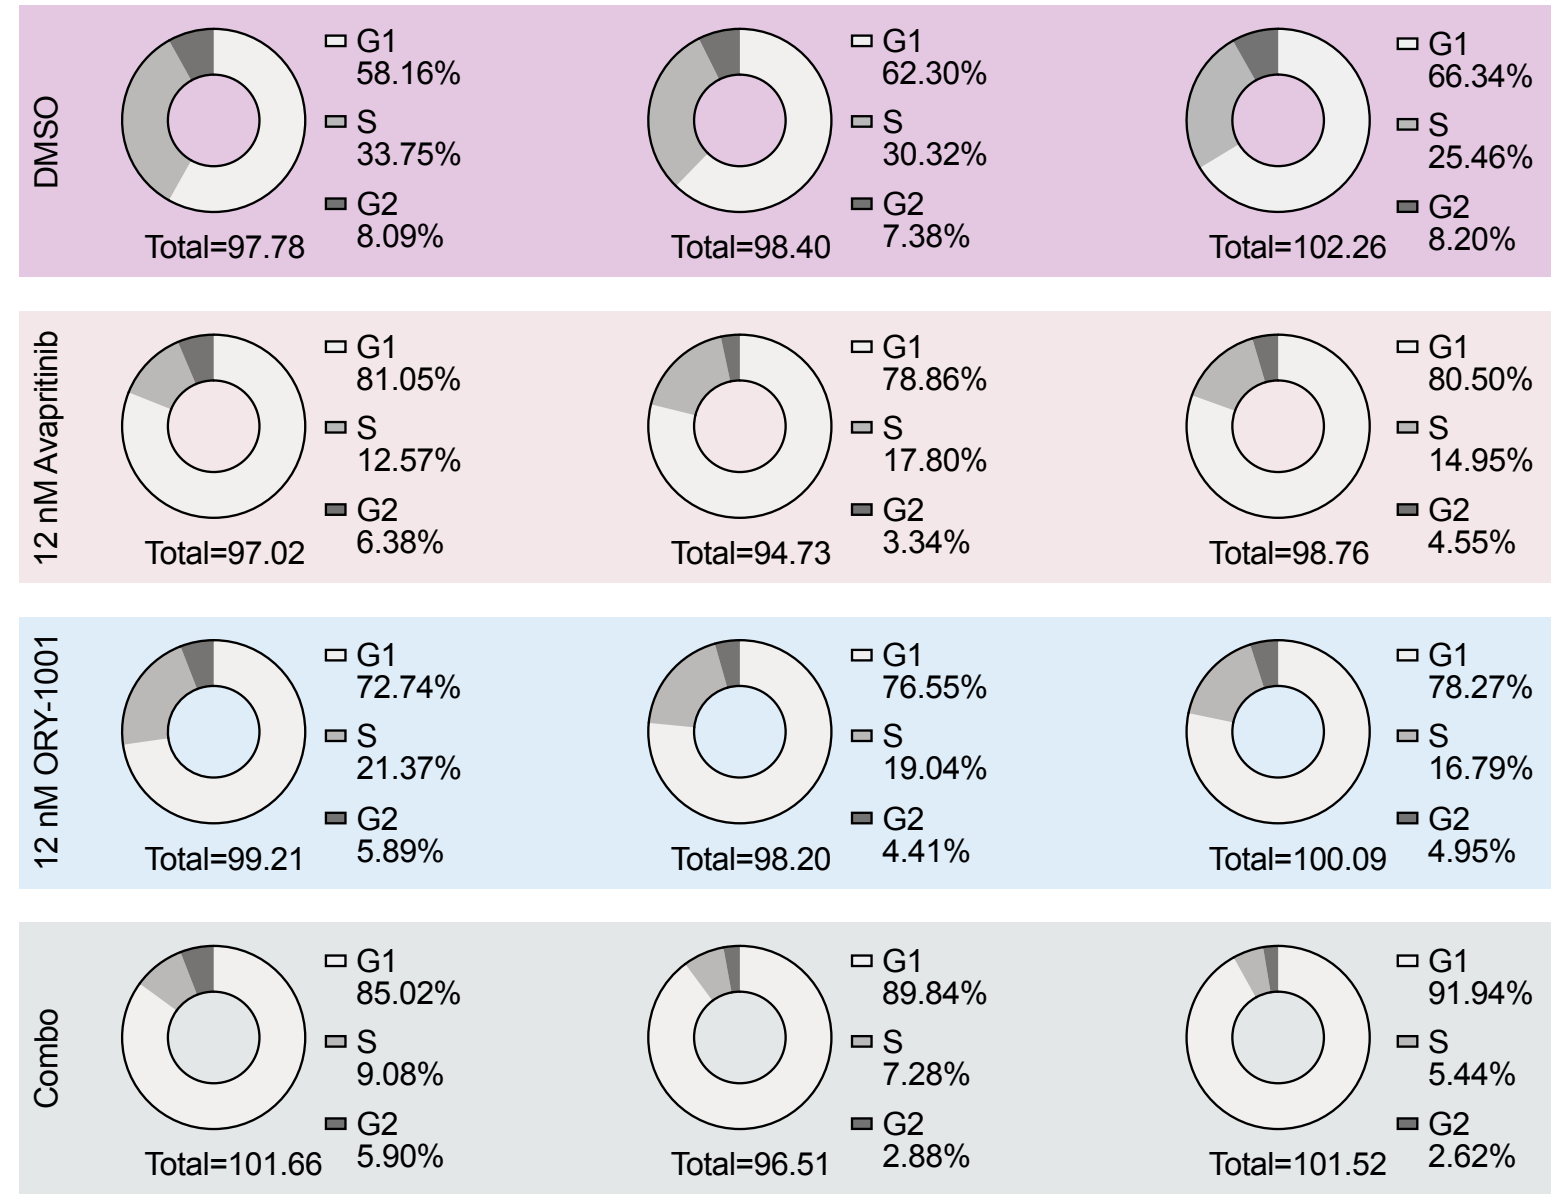

Figure S6



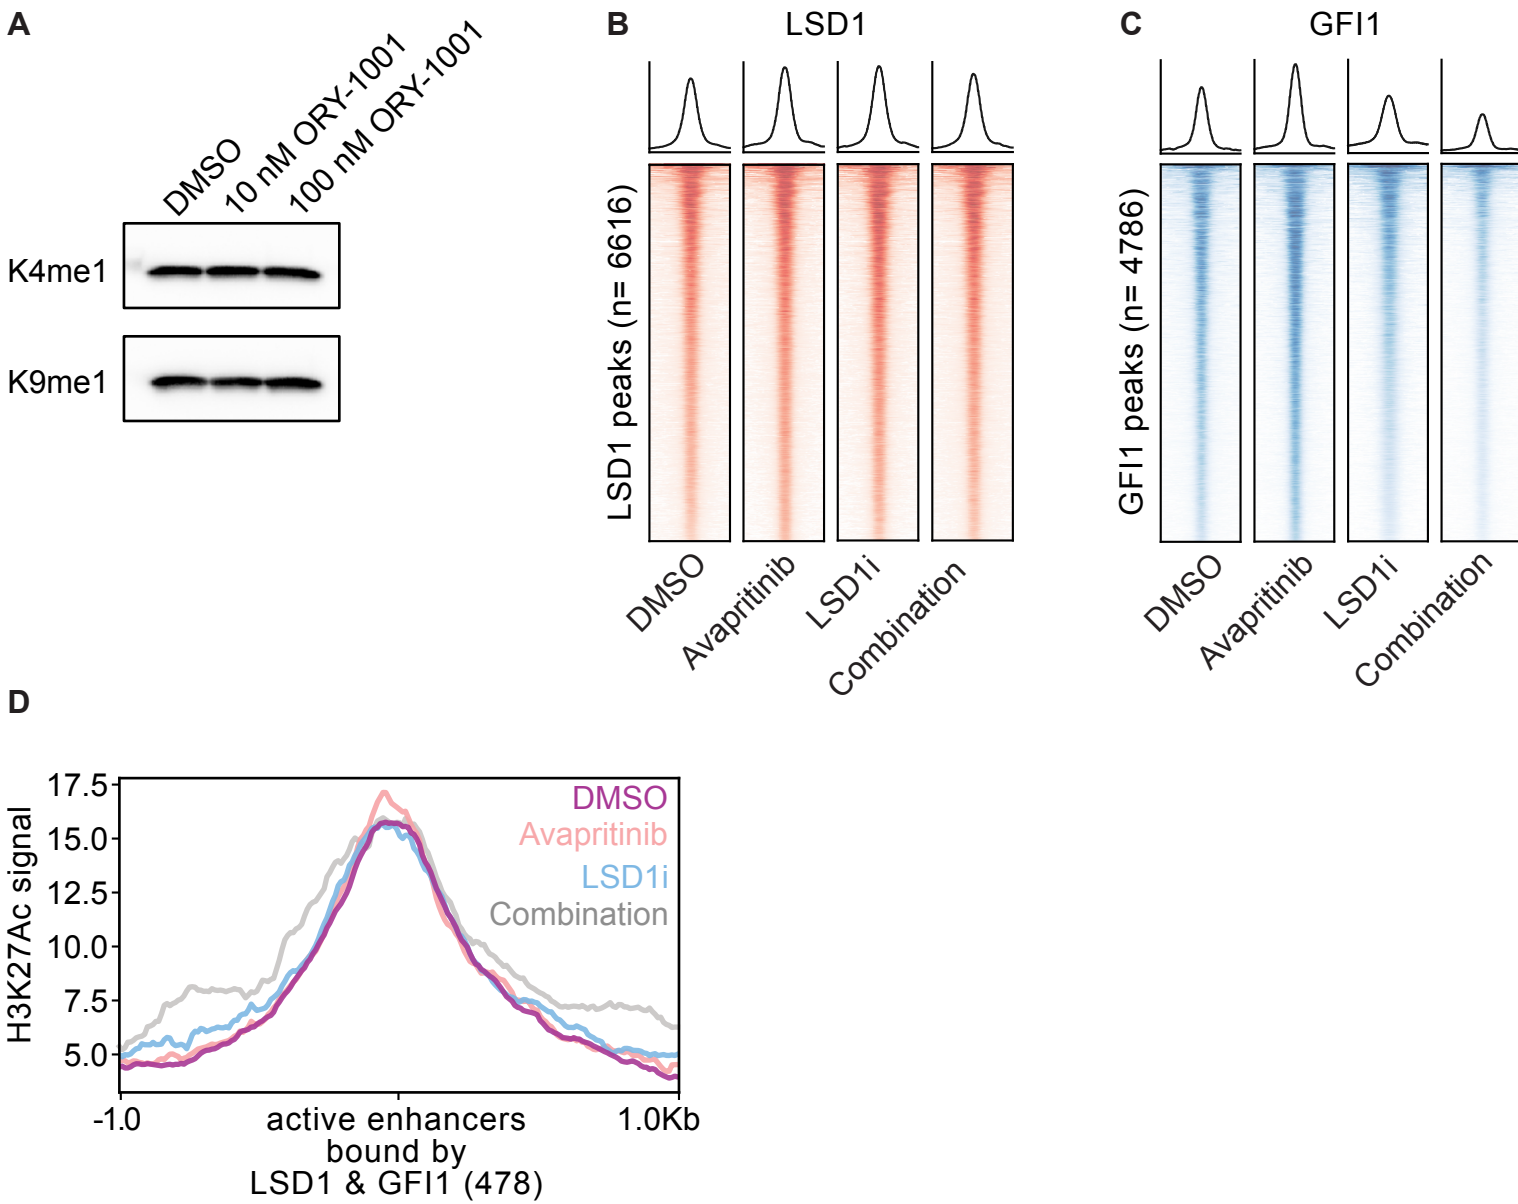

Figure S7

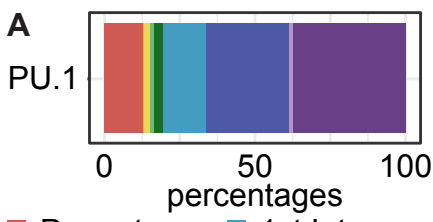

- Promoters
- 5' UTR
- 3' UTR
- 1st Exon
- Other Exon
- 1st Intron
- Other Intron
- Downstream ( $\leq 300$ )
- Distal Intergenic

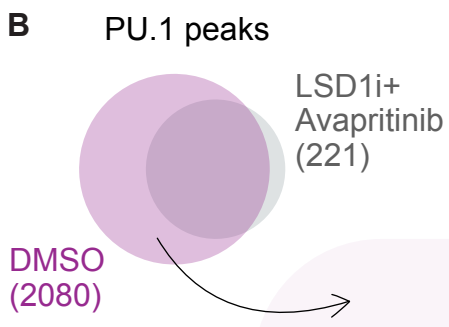

- BinomFDR
- 3.3e-19
  - 2.5e-19
  - 1.6e-19
  - 8.2e-20
  - 4.5e-37
- positive regulation of immune system process
  - myeloid leukocyte activation
  - leukocyte activation involved in immune response
  - immune response
  - immune effector process
  - cell activation involved in immune response

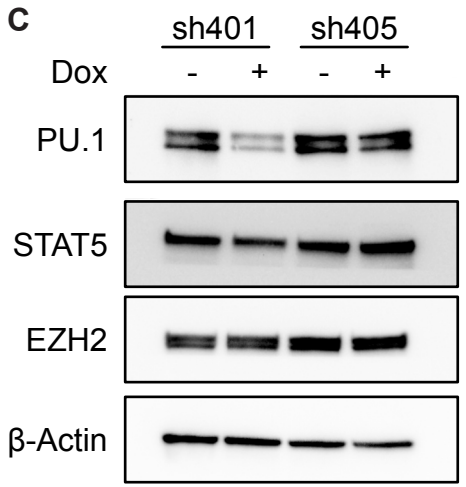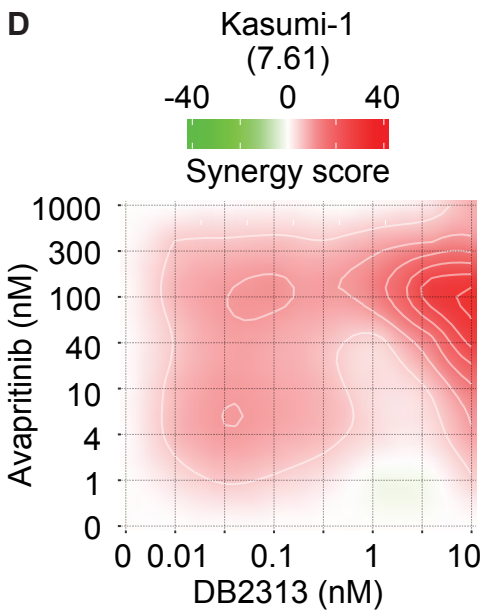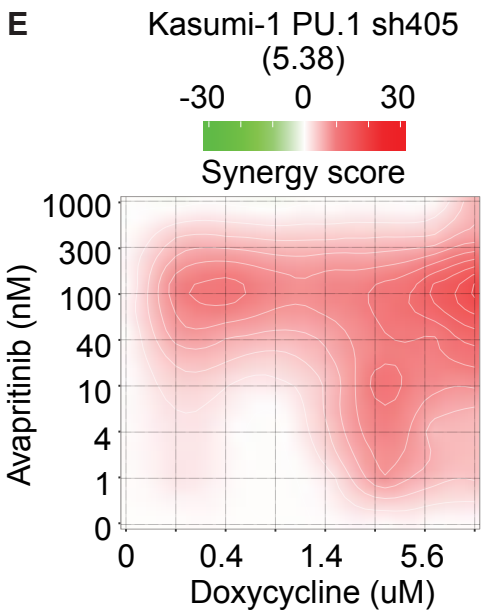

Figure S8

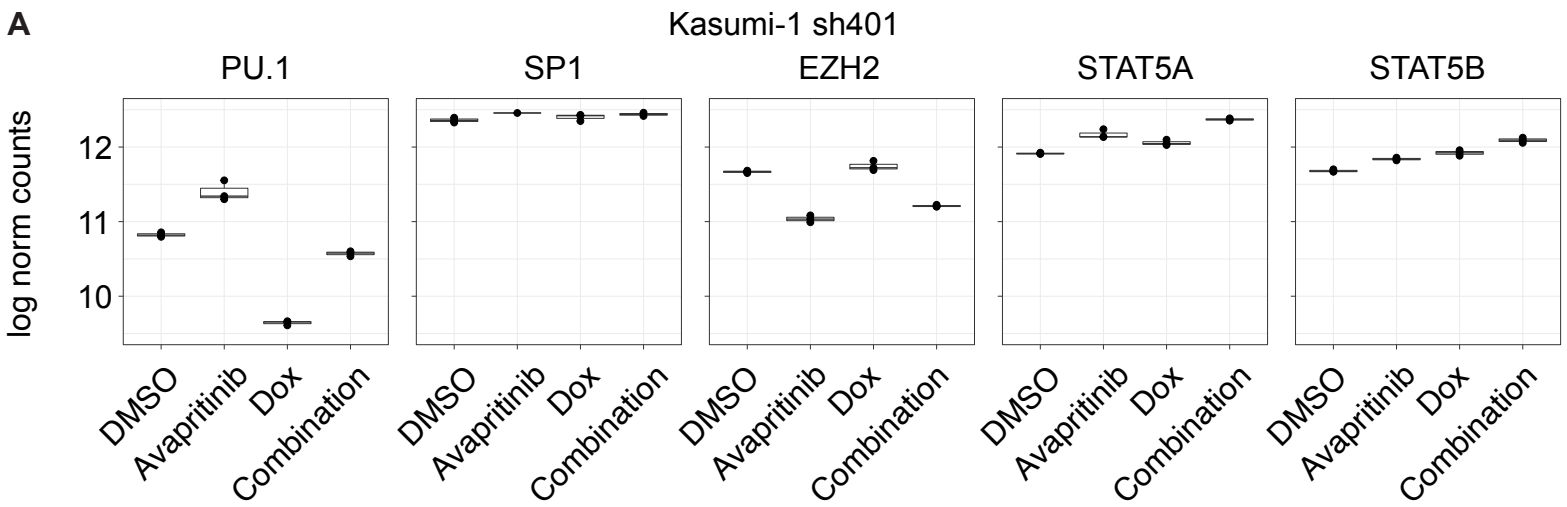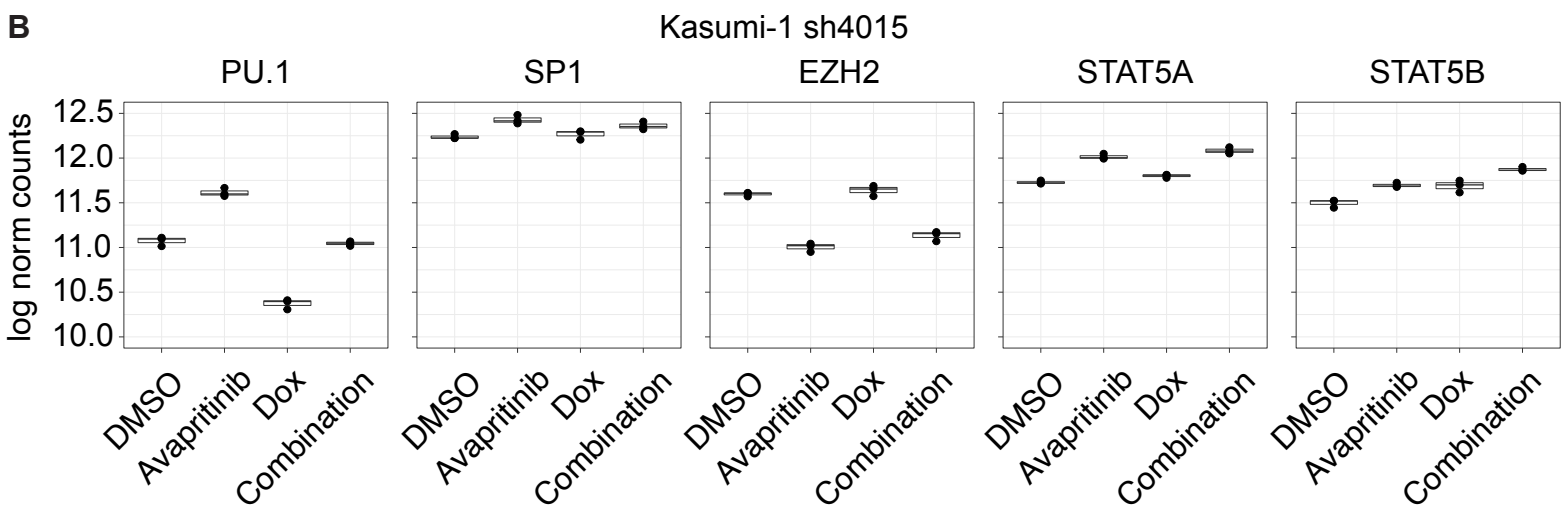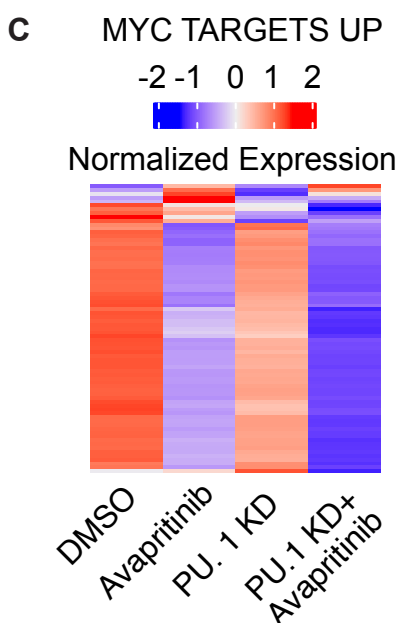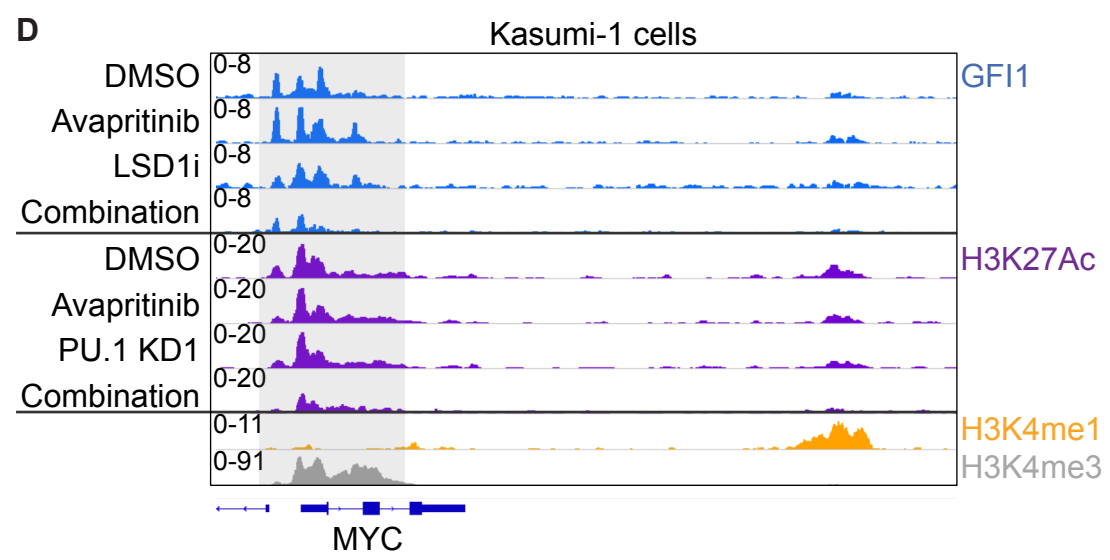

Figure S9

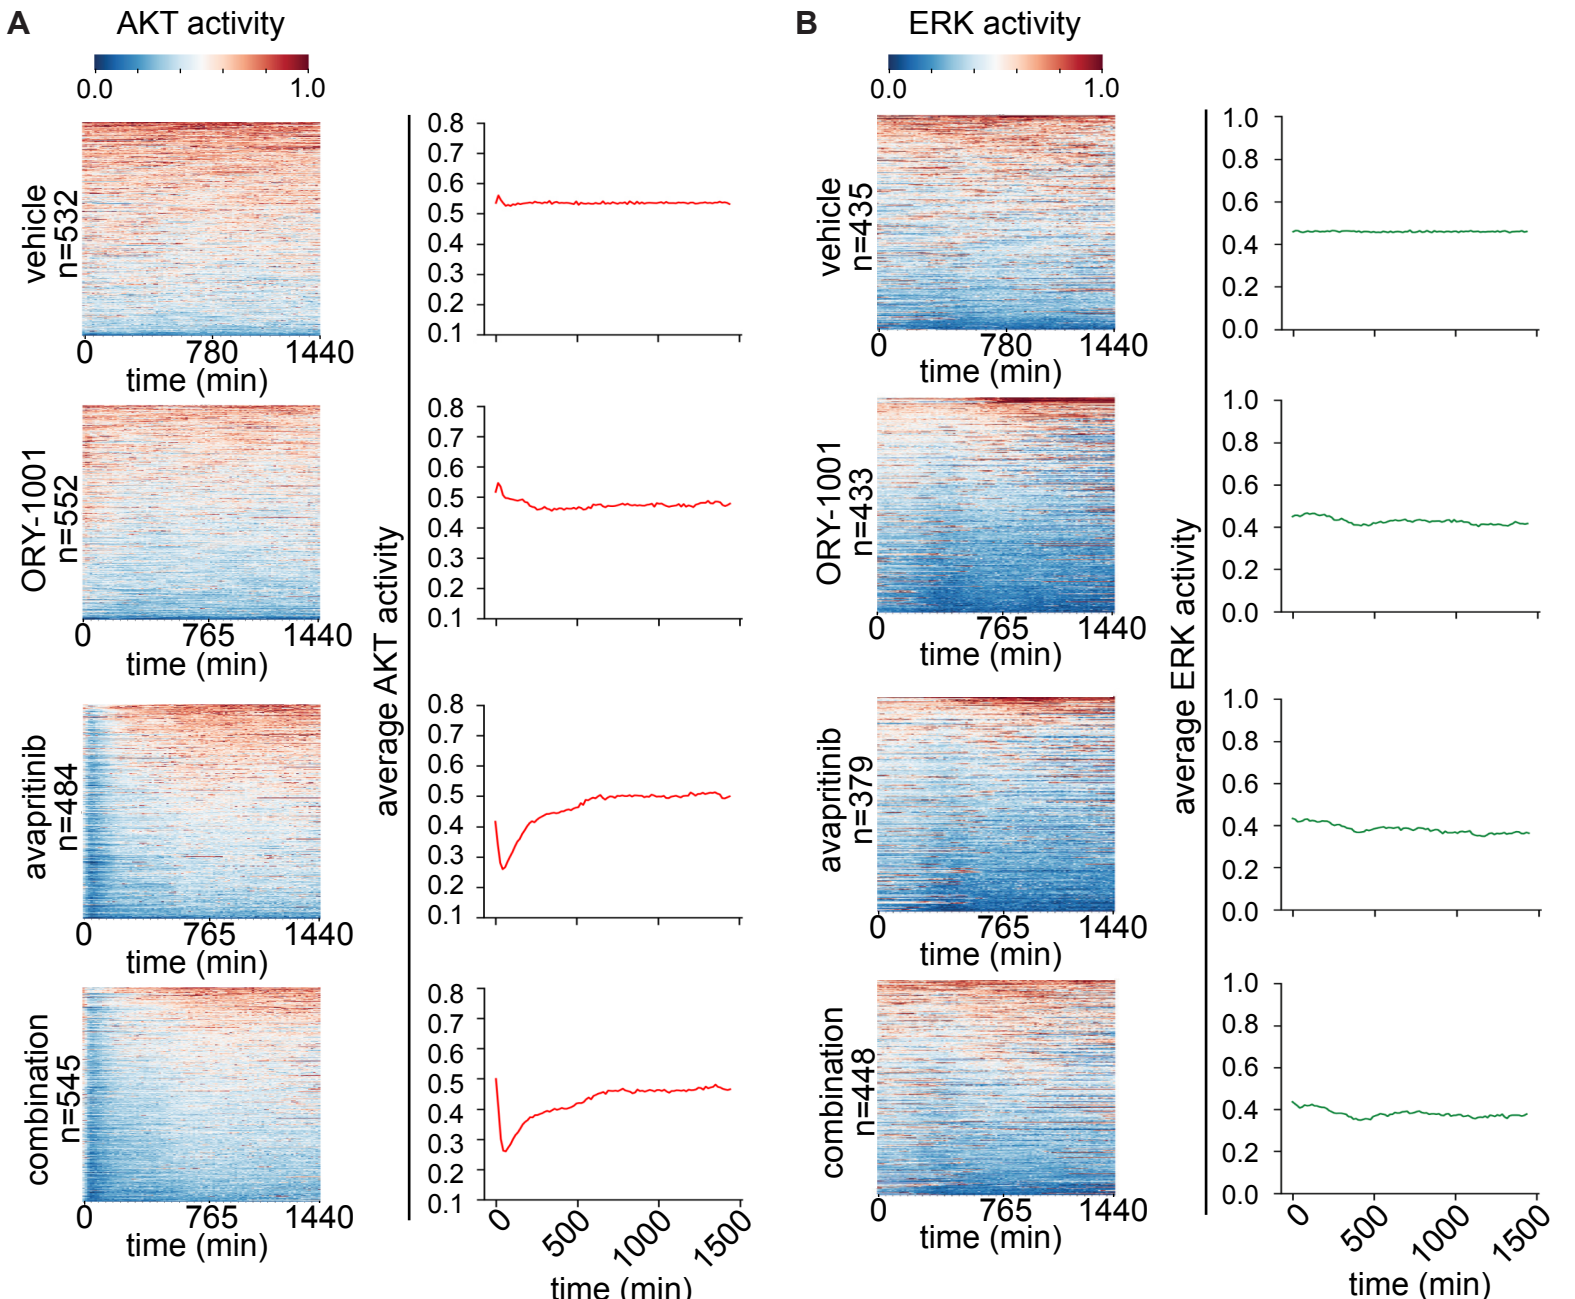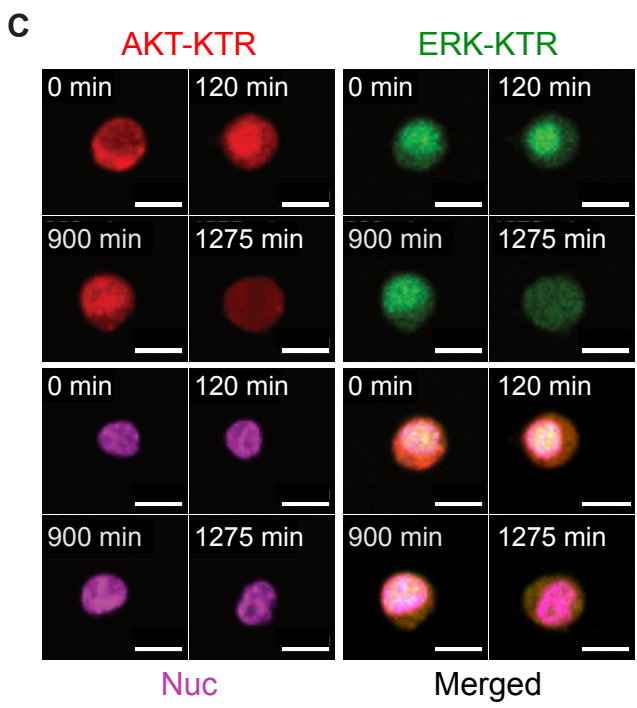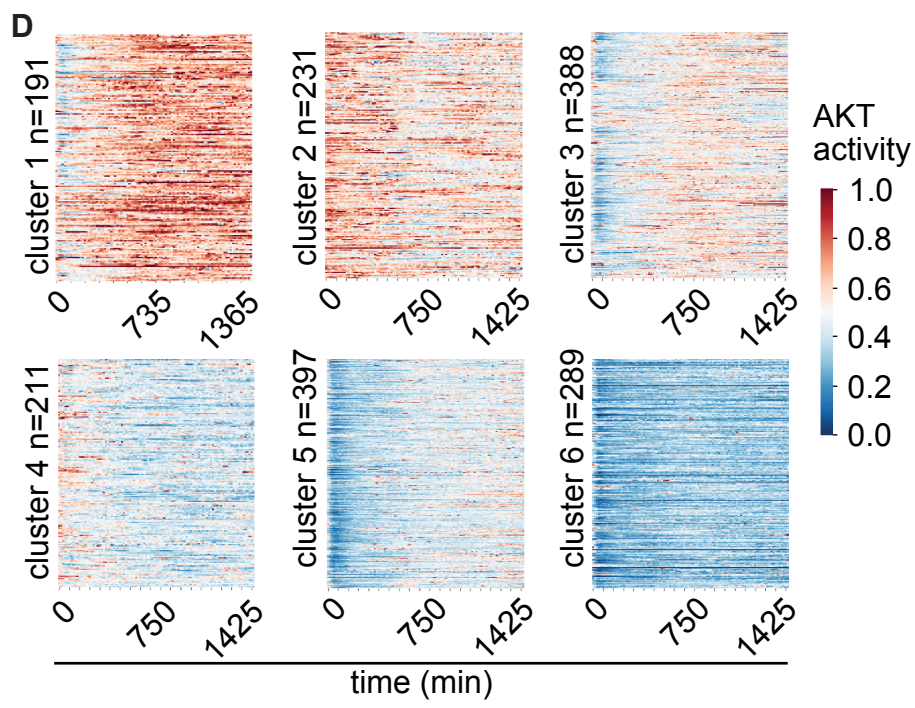

Figure S10

**A**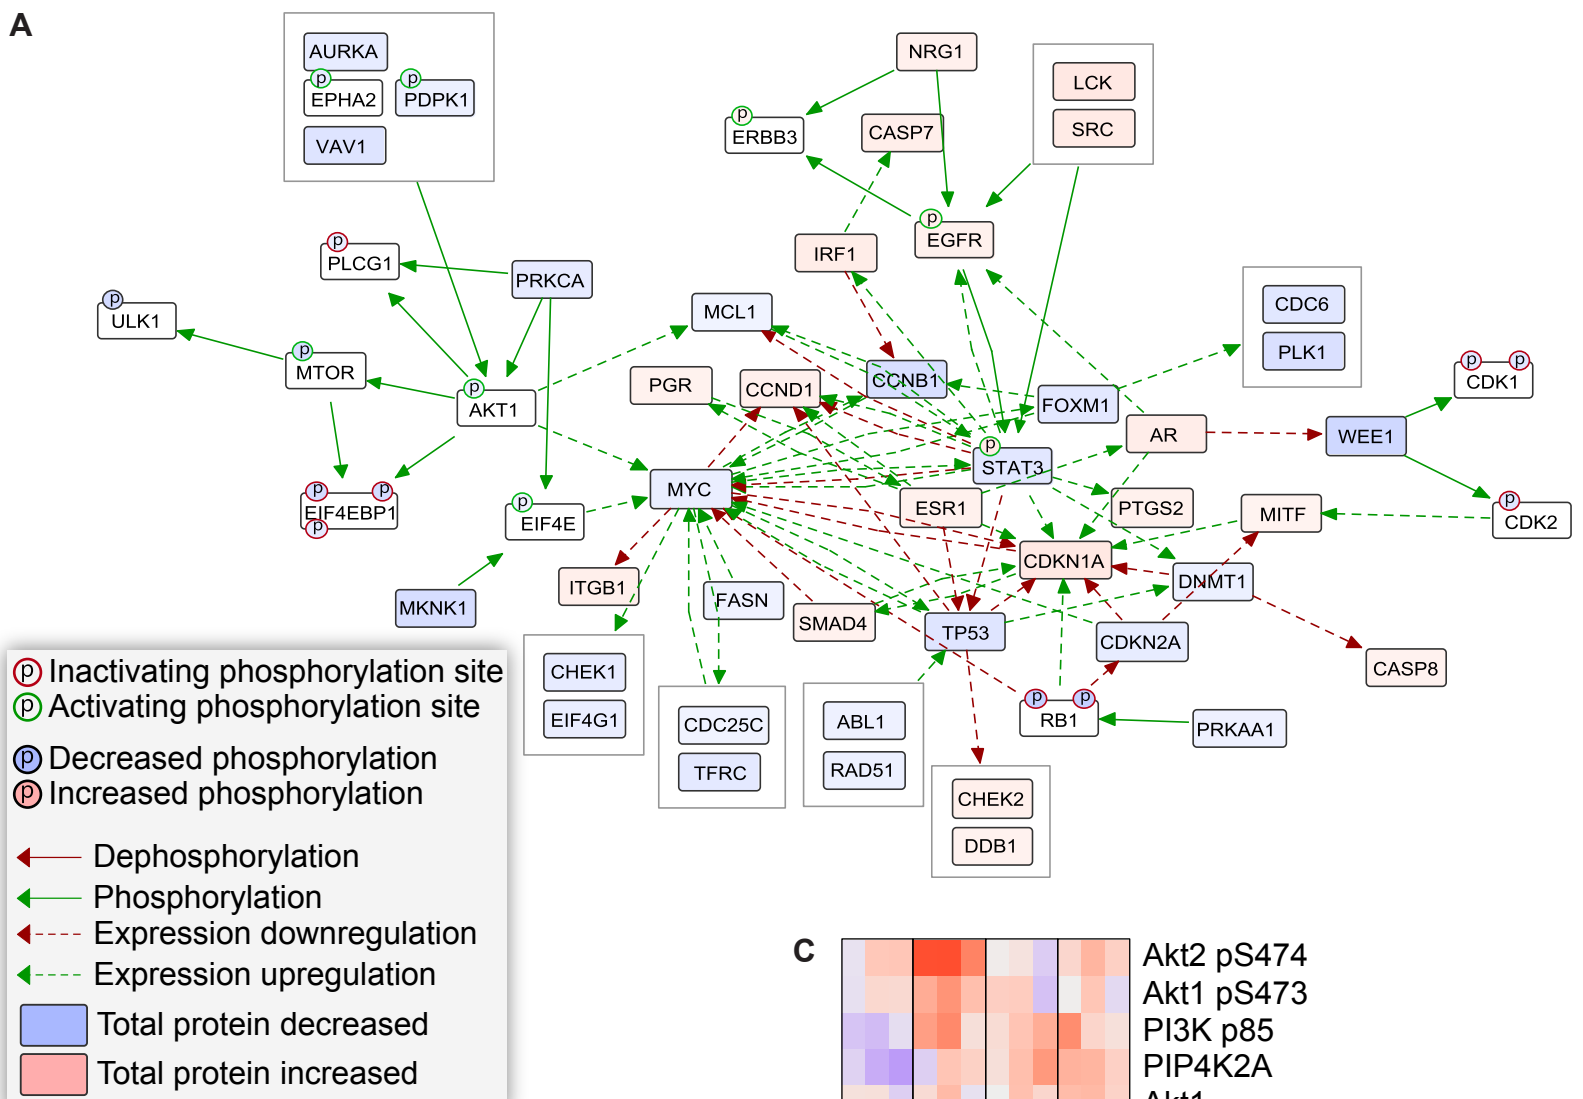**B**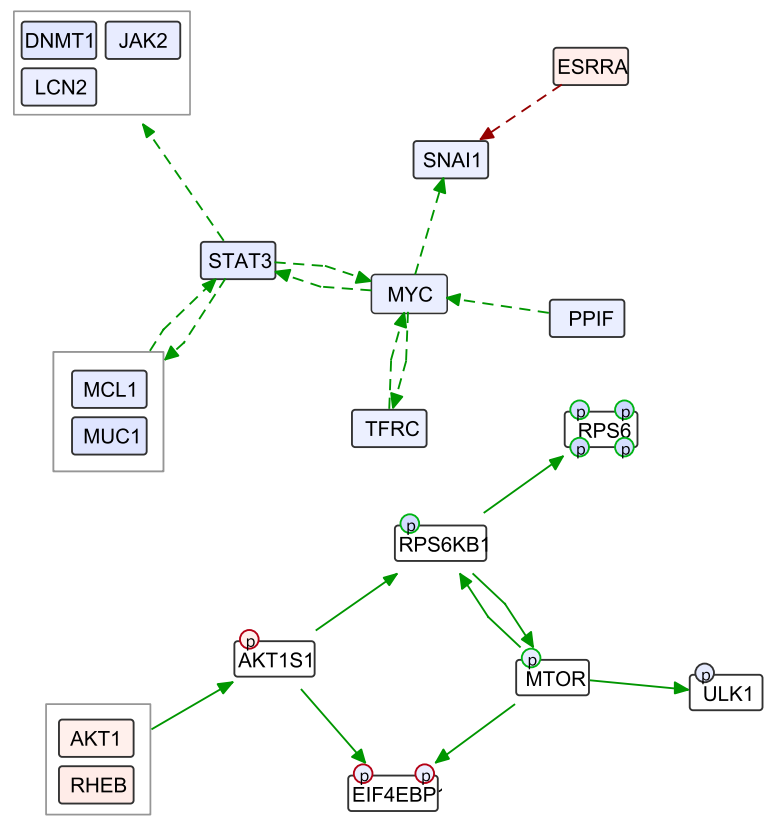**C**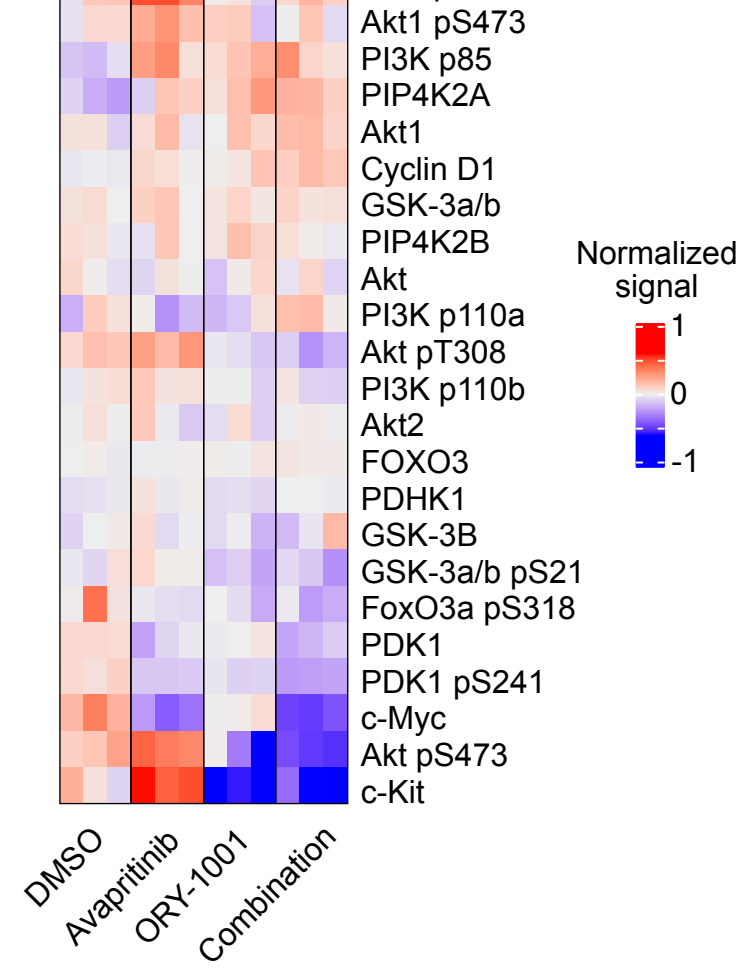

Figure S11

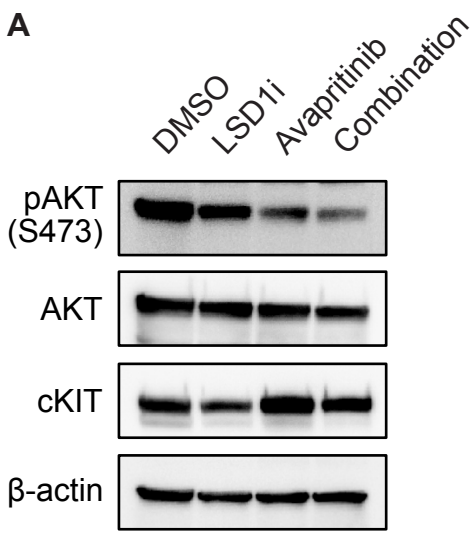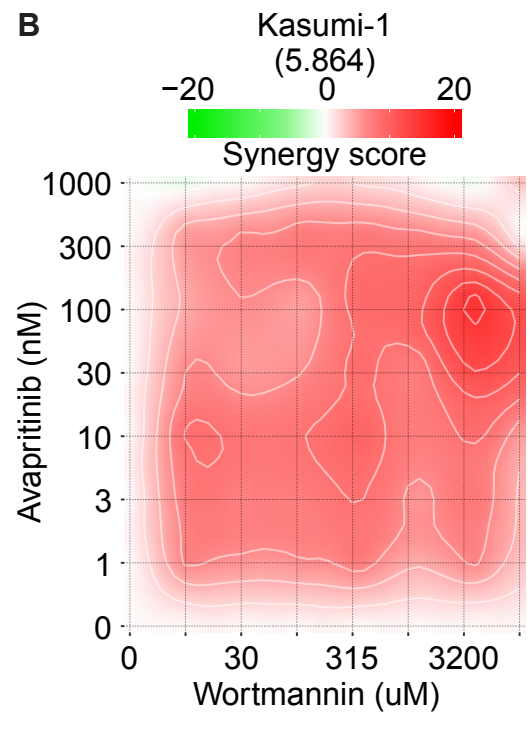

Figure S12

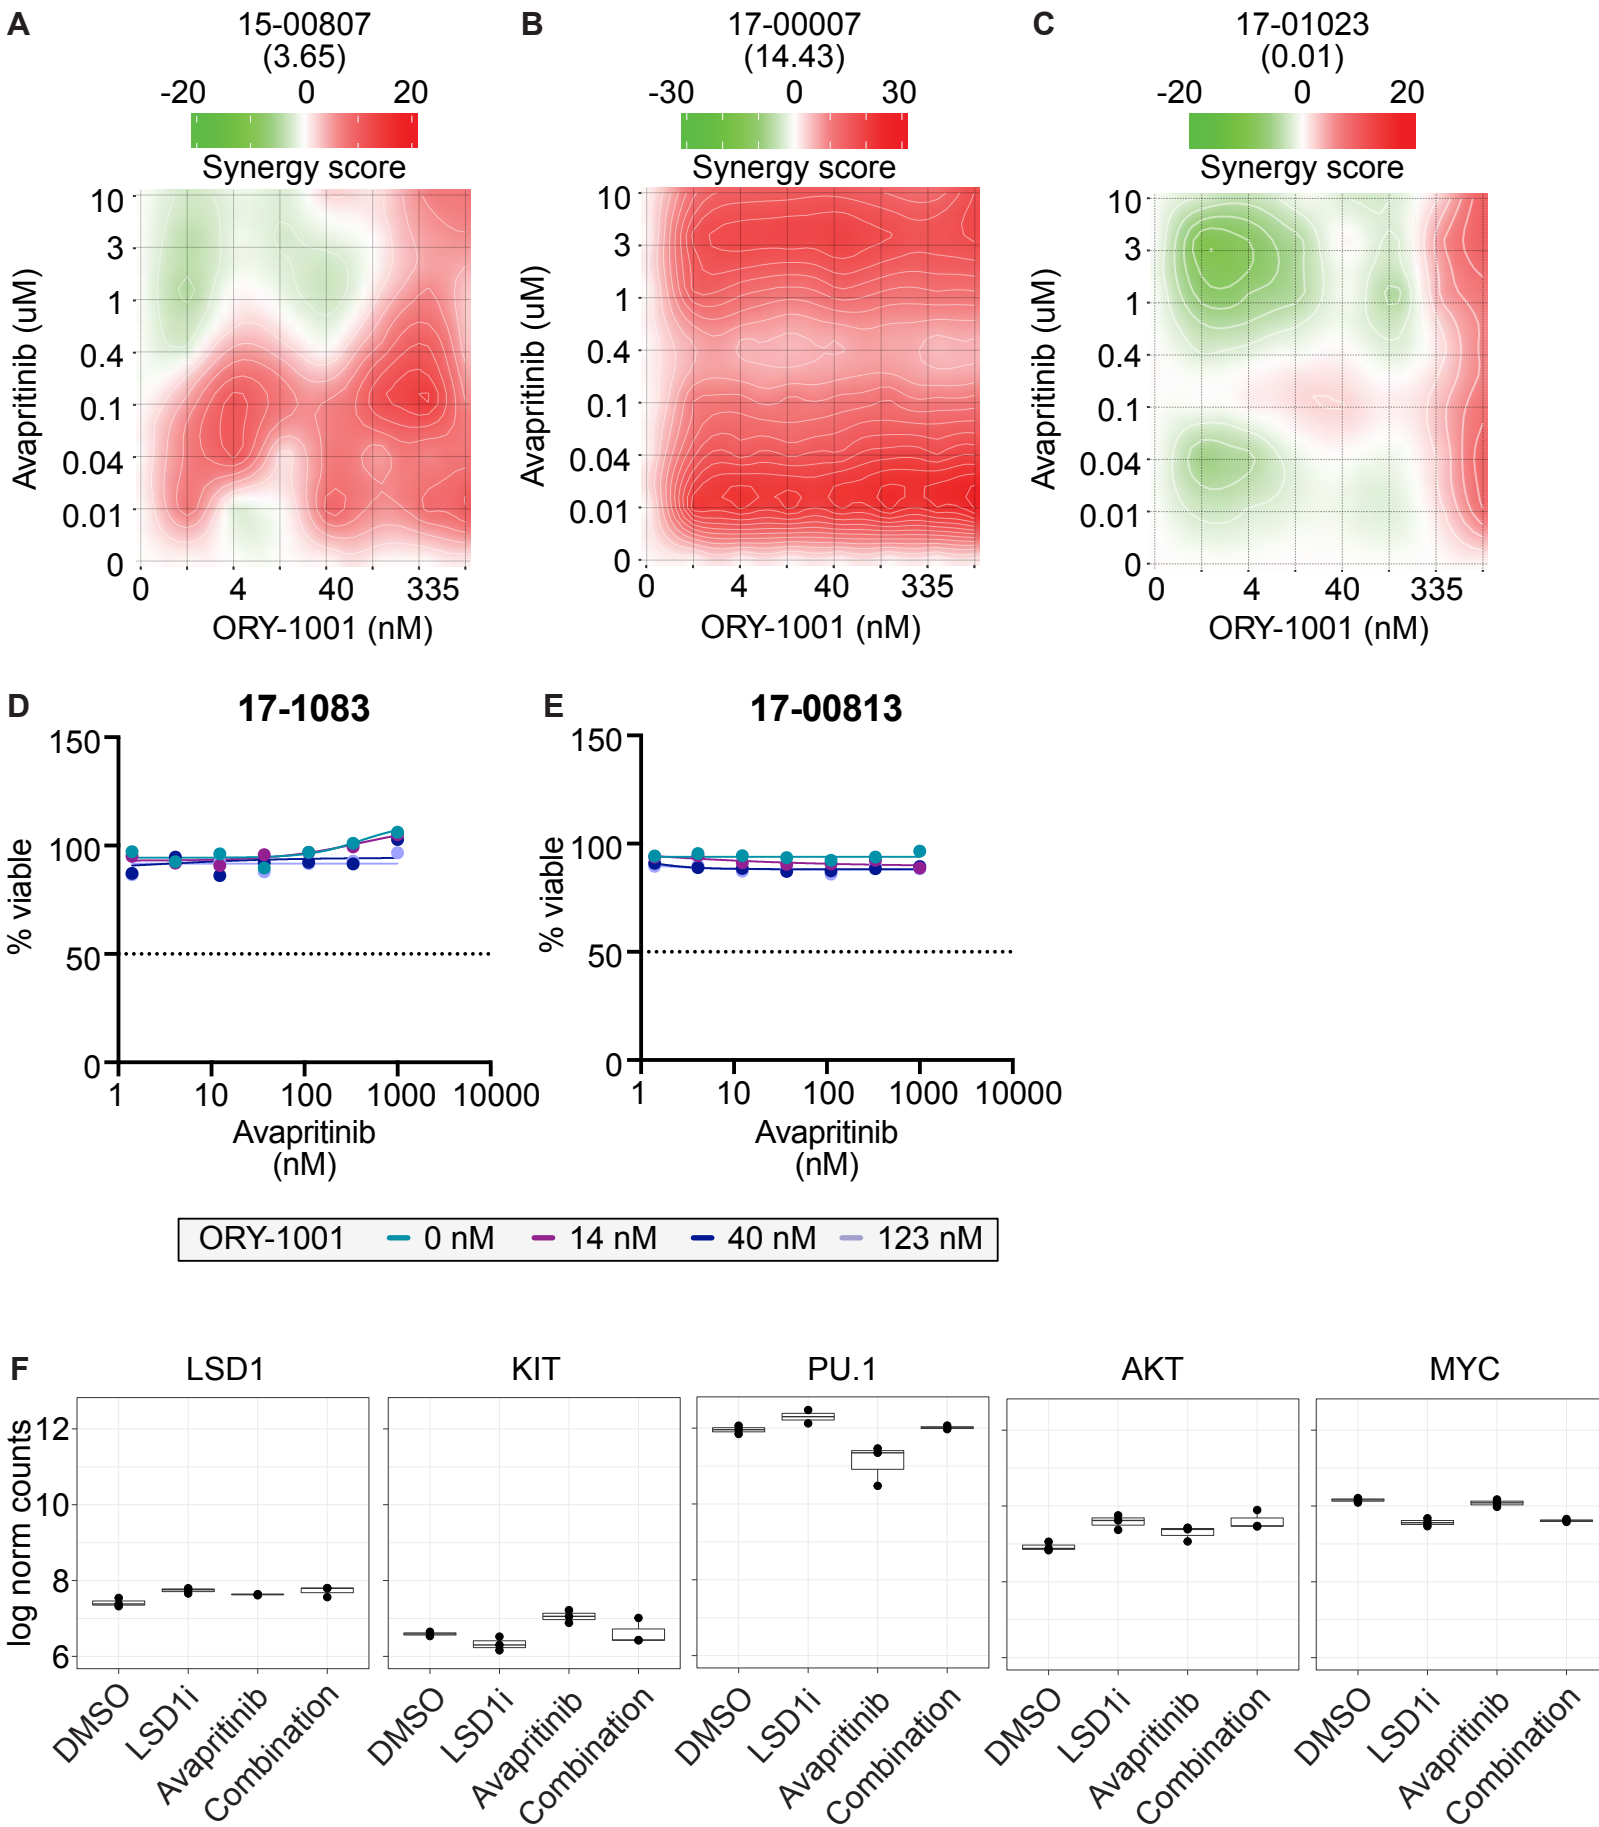

Figure S13

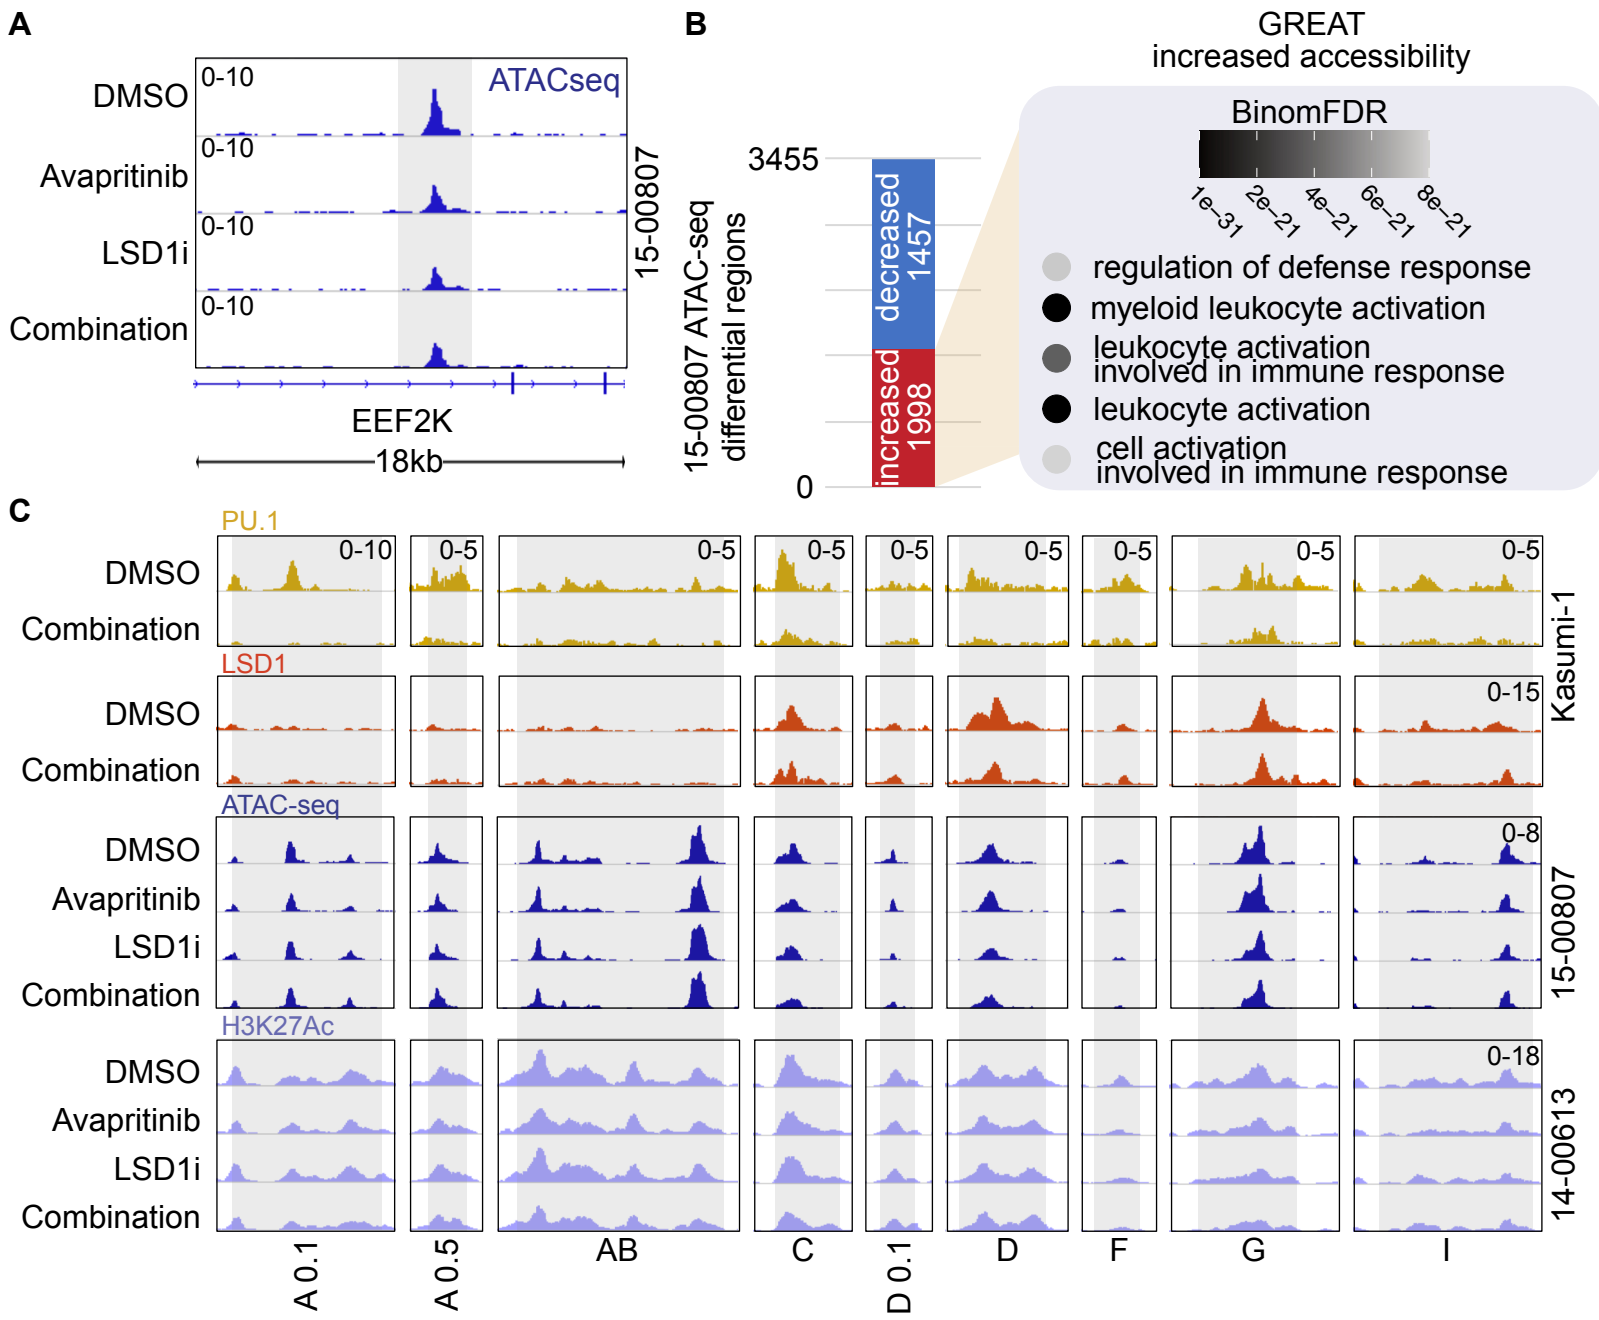

Figure S14



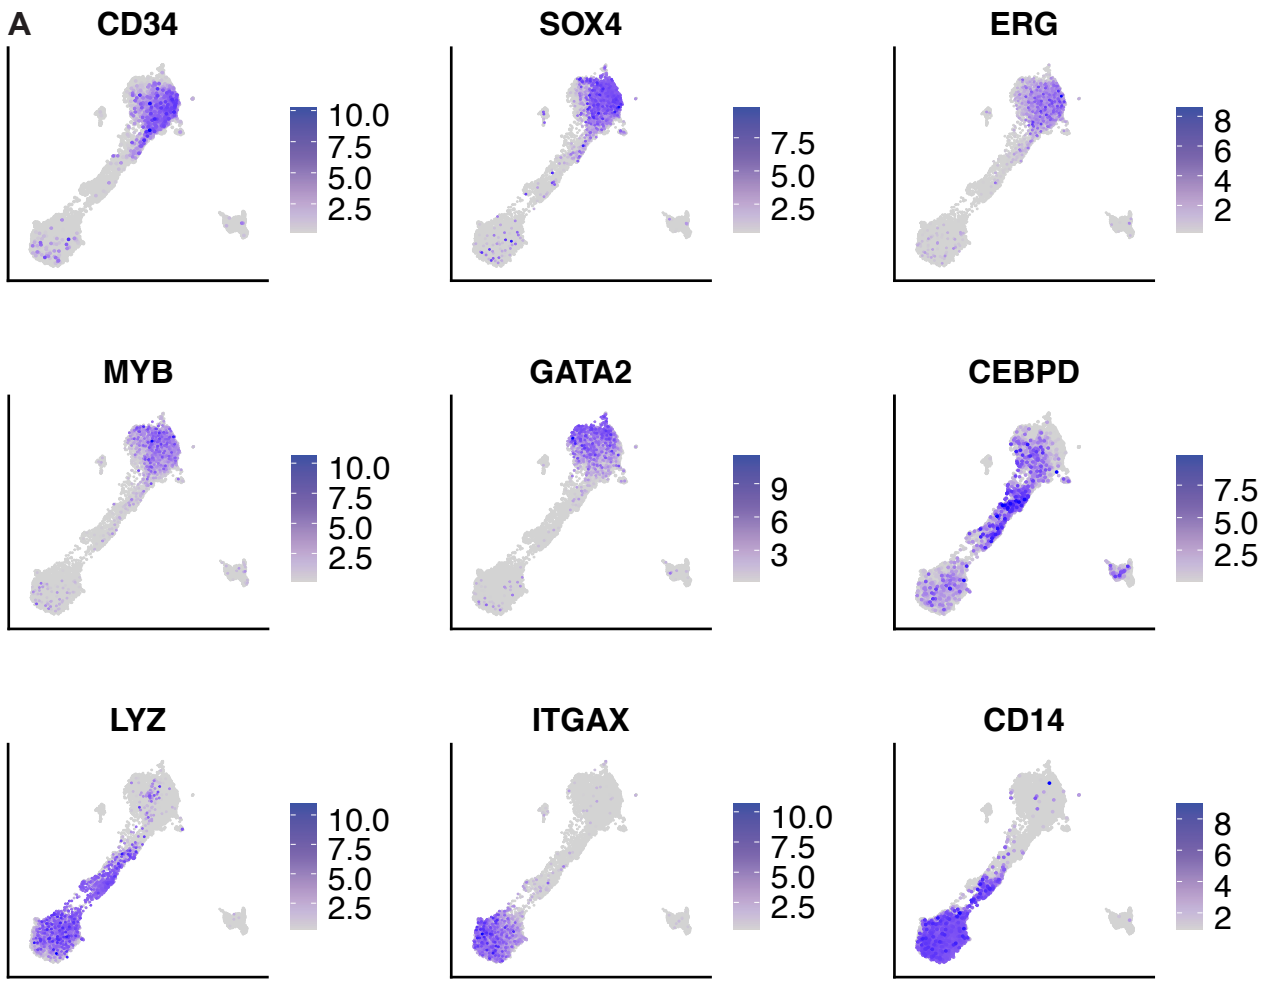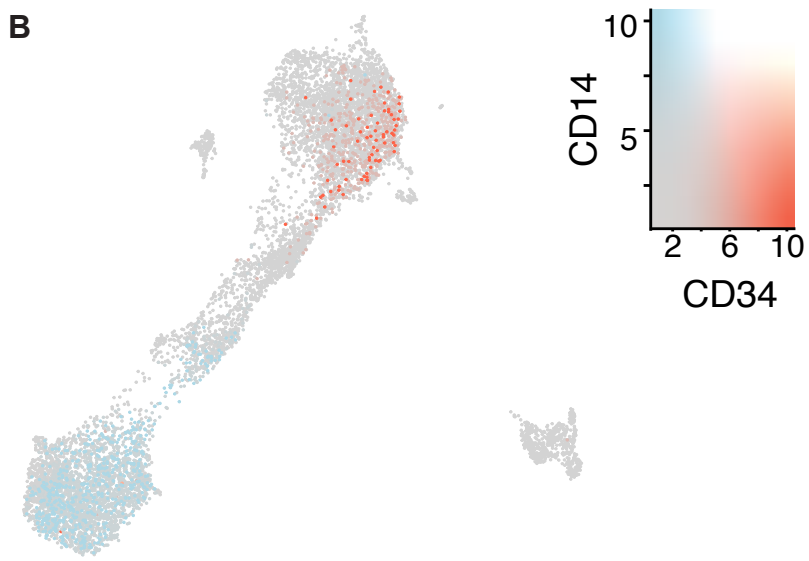

Figure S15

## Supplemental Figure Legends

### Supplementary Figure 1. Protein expression in *KIT*-mutant AML cell line compared to *KIT* wild type cell lines.

Western blot of PU.1, MYC, LSD1, cKIT, pan-AKT, and  $\beta$ -actin in Kasumi-1, Molm-13, and K562 cells. Arrow corresponds to the band at the correct molecular weight for LSD1.

### Supplementary Figure 2. Characterization of specificity and response of KIT and LSD1 inhibition

**A.** Viability assessment for Kasumi-1 cells treated for 72 h with avapritinib and ORY-1001 at different concentrations. Values normalized to average viability of cells with highest dose of both drugs. Error bars representing SEM. **B.** Drug matrix of Kasumi-1 cells treated for 72 h with avapritinib and GSK-LSD1 with synergy assessed by ZIP score (displayed in parentheses). **C.** Proliferation assay over 5 days with SKNO-1 cells treated with DMSO, ORY-1001 (40 nM), avapritinib (40 nM), or the combination; two-way ANOVA with Holm-Sidak correction. Error bars represent SEM. **D, E.** Assessment of apoptosis flow cytometry of Kasumi-1 cells treated for 48 h with avapritinib (36 nM) and/or ORY-1001 (12 nM) as a percent of the parent population and representative plots of PI and Annexin V for each condition; two-way ANOVA with Holm-Sidak correction. Error bars representing SEM. \*  $p < 0.05$ , \*\* $p < 0.01$ , \*\*\* $p < 0.001$ , \*\*\*\* $p < 0.0001$

### Supplementary Figure 3. Increased mature surface marker differentiation with LSD1 inhibition.

**A-C.** Flow cytometry assessment of CD11b, CD86, and CD84 surface markers in Kasumi-1 cells treated for 24, 48, and 72 h, respectively, with DMSO, ORY-1001 (12 nM), avapritinib (12 nM), or combination. Representative histograms of surface marker signal with solid line representing the positive cut-off and bar graph of positive cells; two-way ANOVA with Holm-Sidak correction. Error bars representing SEM. \*  $p < 0.05$ , \*\* $p < 0.01$ , \*\*\*\* $p < 0.0001$ . **D.** Cytospin of Kasumi-1 cells treated for 72 h with avapritinib (12 nM), ORY-1001 (12 nM), GSK-LSD1 (12 nM), avapritinib/ORY-1001 (12 nM each), or avapritinib/GSKLSD1 (12 nM each) stained with May Grunwald-Giemsa. Scale bar represents 10  $\mu$ m.

### Supplementary Figure 4. LSD1 inhibitor induced differentiation is not reversible and combined LSD1/KIT inhibition is well tolerated in healthy mice.

**A.** Flow cytometry assessment of CD11b, CD84, and CD86 in Kasumi-1 cells treated for 72 h with DMSO, avapritinib (12 nM), ORY-1001 (12 nM), or the combination. **B.** Same flow cytometry assessment as G, 72 h after removal of treatment; two-way ANOVA with Holm-Sidak correction. \*  $p < 0.05$ , \*\* $p < 0.01$ , \*\*\* $p < 0.001$ , \*\*\*\* $p < 0.0001$ . **C.** Wild-type

C57BL/6J mice were treated with avapritinib (10 mg/kg/day) by gavage and ORY-1001 (0.0125 mg/kg/day) by intraperitoneal injection daily for 2 weeks ( $n=6$ /group). Body weight pre and post treatment. **D.** White blood cell (WBC) count pre and post treatment. **E.** Hemoglobin (Hgb) pre and post treatment. **F.** Platelets pre and post treatment. Two-way ANOVA with Holm-Sidak correction. Error bars represent SEM. \*\*  $p < 0.01$

### Supplementary Figure 5. Loss of total MYC protein and acetylation at MYC bound promoters

**A.** Western blot of total MYC, PU.1, LSD1, cKIT and loading control ( $\beta$ -Actin) in Kasumi-1 cells 24 h after treatment with avapritinib (12 nM) and/or ORY-1001 (12 nM; LSD1i). LSD1 and cKIT are included as controls. **B.** Viability of Kasumi-1 cells with pMIG MYC-OE (over expression) or pMIG Empty treated for 72 h with avapritinib and 0 nM or 12 nM of ORY-1001. Viability determined by MTS. Area under the curve (AUC) of the viability plot is displayed. Two-way ANOVA with Holm-Sidak correction. Error bars represent SEM. \*\*  $p < 0.01$ , \*\*\*  $p < 0.001$ , \*\*\*\*  $p < 0.0001$ . **C.** Venn diagram of peaks from Kasumi-1 CUT&Tag used to define regulatory elements. Promoters defined as H3K4me3 peaks  $<1$  kb from a TSS; enhancers defined as H3K4me1 peaks  $>1$  kb of a TSS. Regulatory elements that overlap with H3K27Ac are defined as active ( $n=2$ /group). **D.** Box and whisker plot of H3K27Ac signal at MYC bound promoters. KS test used to assess statistical significance. Boxes defined by the interquartile range (IQR) split by the median, with whiskers extending no further than 1.5x IQR from the box. Outliers are individually plotted. **E.** Gene ontology term enrichment for MYC bound promoters.

### Supplementary Figure 6. Decreased cell cycle progression with combined LSD1 and KIT inhibition

**A, B.** Cell cycle flow cytometry assay with PI of Kasumi-1 cells treated for 24, 48, or 72 h with avapritinib (12 nM) and/or ORY-1001 (12 nM). Bar chart of percentage of cells within G1, S, or G2 phase and pie chart of percent of cells within each phase of cell cycle ( $n=3$ /group). Two-way ANOVA with Holm-Sidak correction. Error bars represent SEM. \*  $p < 0.05$ , \*\*  $p < 0.01$ , \*\*\*\*  $p < 0.0001$

### Supplementary Figure 7. Activation of LSD1 and GFI1 bound enhancers with KIT and LSD1 inhibition

**A.** Following treatment of kasumi-1 cells for 24 h with DMSO or ORY-1001, lysates were extracted and histone methylation (H3K4me1 and H3K9me1) was assessed. **B, C.** Kasumi-1 cells were treated for 12 h (LSD1) or 24 h (GFI1) with avapritinib (12 nM) and/or LSD1 inhibitor (12 nM; ORY-1001 and GSK-LSD1 respectively) then subject to CUT&RUN ( $n=2-3$ /group). Heatmaps of global signal for LSD1 and GFI1 at their respective high confidence consensus peak sets (peak apex  $\pm 1$  kb). **D.** Peak profile and plot

of H3K27Ac signal at active enhancers bound by LSD1 and GFI1 in Kasumi-1 cells after 24 h of treatment with avapritinib (12 nM) and/or GSK-LSD1 (12 nM; LSD1i).

**Supplementary Figure 8. PU.1 inhibition and knock down synergize with KIT inhibition**

**A.** Annotation of high confidence consensus PU.1 peaks. **B.** Gene ontology analysis of PU.1 peaks lost with LSD1 and KIT inhibition. **C.** Western blot of PU.1 in Kasumi-1 shRNA knockdown cells treated with and without 1  $\mu$ g/mL doxycycline for 48 h. STAT5 and EZH2 included as controls to assess off-target effects. **D, E.** Drug matrix of Kasumi-1 cells treated for 72 h with avapritinib and DB2313 or doxycycline with synergy assessed by ZIP (reported in parentheses).

**Supplementary Figure 9. PU.1 knock down with KIT inhibition results in decreased MYC target gene activation**

**A, B.** Bulk RNA-seq of Kasumi-1 cells with PU.1 shRNA knockdown treated with DMSO, avapritinib (12 nM), PU.1 sh401 (1  $\mu$ g/mL doxycycline), or both ( $n=3$ /group). Log<sub>2</sub> normalized mRNA levels for PU.1, SP1, EZH2, STAT5A, and STAT5B with PU.1 knockdown via sh401 or sh405, respectively, to assess knockdown specificity. **C.** Normalized expression of MYC targets up gene set. **D.** GFI1, H3K27Ac, H3K4me1, and H3K4me3 tracks at MYC promoter and +26 kB enhancer. For GFI1 CUT&RUN, Kasumi-1 cells were treated with avapritinib (12 nM), GSK-LSD1 (LSD1i; 12 nM), or both. For H3K27Ac CUT&Tag, Kasumi-1 cells were treated with avapritinib (12 nM), PU.1 sh401 (1  $\mu$ g/mL doxycycline), or both.

**Supplementary Figure 10. Dual LSD1 and KIT inhibition leads to reduction of AKT and not ERK signaling**

**A, B.** Heatmaps of AKT and ERK dynamics of individual cells (every row) in response to ~25h treatment of DMSO, ORY-1001 (12 nM), avapritinib (100 nM), and the combination.  $n$  represents the total number of tracked cells in each condition. Line plots represent population average of AKT and ERK dynamics over time. **C.** Example of time-series images of fluorescent cells under the combination treatment. AKT-KTR = mScarlet, ERK-KTR = Clover, and Nuc = miRFP670nano. Scale bar represents 10  $\mu$ m. **D.** Heatmaps of cells grouped into different AKT dynamic clusters by hierarchical clustering.

**Supplementary Figure 11. Identify AKT as prominent pathway leading to MYC repression**

**A.** CausalPath analysis of RPPA results of Kasumi-1 cells treated for 24 h with avapritinib (100 nM) and/or ORY-1001 (12 nM) or DMSO. **B.** CausalPath analysis of

RPPA as in A after 1 h of drug exposure. **C.** Heatmap of the normalized signal for PI3K/AKT pathway members after 24 h of drug exposure.

**Supplementary Figure 12. Validation of changes in pAKT due to KIT and LSD1 inhibition.**

**A.** Kasumi-1 cells treated with DMSO, ORY-1001 (12 nM), avapritinib (500 nM), or the combination for 24 h. Western blot of pAKT (S473), pan-AKT, cKIT, and  $\beta$ -actin. **B.** Drug matrix of Kasumi-1 cells treated for 72 h with avapritinib and wortmannin, PI3K inhibitor, with synergy assessed by ZIP score (displayed in parentheses).

**Supplementary Figure 13. Additional KIT and LSD1 inhibitor synergy plots in *KIT*-mutant AML patient samples**

**A-C.** Drug matrices of patient samples 15-00807, 17-00007, and 17-0123 treated for 72 h with avapritinib and ORY-1001 with synergy assessed by ZIP score (displayed in parentheses). **D,E.** Viability of *KIT* wild type AML patient samples after 72 h of treatment with avapritinib and ORY-1001. **F.** Bulk RNA-seq on 14-00613 treated with DMSO, avapritinib (50 nM), ORY-1001 (12 nM), or the combination for 24 h. Log2 normalized mRNA levels of LSD1, KIT, PU.1, AKT, and MYC.

**Supplementary Figure 14. Epigenetic changes in *KIT*-mutant AML patient samples following LSD1 and KIT inhibition.**

**A.** Example of decreased accessibility at cell cycle associated locus, *EEF2K*, from bulk ATAC-seq in 15-00807. **B.** Differential analysis of bulk ATAC-seq on 15-00807 treated with avapritinib (50 nM) and ORY-1001 (50 nM) compared to DMSO. Enrichment of GO terms for regions with significantly increased accessibility. **C.** Visualization of Kasumi-1 PU.1 and LSD1, 15-00807 bulk ATAC-seq, and 14-00613 H3K27Ac at entire *BENC* locus. *BENC* modules were identified by previous annotation of the region(24) and intersection with H3K4me1 signal.

**Supplementary Figure 15. Single cell RNA-seq markers for differentiation**

**A.** Integrated single cell RNA-seq object showing the expression of differentiation markers. Markers were used to identify early, mid, and late stages of hematopoiesis in patient sample 14-00613. **B.** Detected levels of CD34 (early) and CD14 (late) in integrated object to show overall differentiation trajectory.
